# Supplementary material for: Accurate and rapid prediction of p K a of transition metal complexes: semiempirical quantum chemistry with a data-augmented approach
Source: Royal Society of Chemistry journal article supplement (doi:10.1039/d0cp05281g), 2020-12-09
Supplement: d0cp05281g4.csv [file d0cp05281g4.csv]

Index	Metal center	Complex AH	pKa	solvent	reference base	DOI	DOI2	DOI3	page number	Temperature (K)	Comments	Index	SMILES (A)	SMILES(AH)
1	Ni	[HNi(dmpe)2]+	24.4	bezonitrile	tetramethylguanidine	http://dx.doi.org/10.1021/acscatal.7b03396	http://dx.doi.org/10.1021/ja991888y	http://dx.doi.org/10.1021/ja0116829	1314 ; 11436	298		1	[Ni]12(P(CCP2(C)C)(C)C)P(CCP1(C)C)(C)C	[NiH]12(P(CCP2(C)C)(C)C)P(CCP1(C)C)(C)C
2	Ni	[HNi(depe)2]+	23.8	bezonitrile	tetramethylguanidine	http://dx.doi.org/10.1021/acscatal.7b03396	http://dx.doi.org/10.1021/ja991888y	http://dx.doi.org/10.1021/ja0116829	1314 ; 11436	298		2	[Ni]12(P(CCP2(CC)CC)(CC)CC)P(CCP1(CC)CC)(CC)CC	[NiH]12(P(CCP2(CC)CC)(CC)CC)P(CCP1(CC)CC)(CC)CC
3	Ni	[HNi(dmpp)2]+	24	bezonitrile	tetramethylguanidine	http://dx.doi.org/10.1021/acscatal.7b03396	http://dx.doi.org/10.1021/ja991888y	http://dx.doi.org/10.1021/ja0116829	1314 ; 11436	298		3	[Ni]12(P(CCCP2(C)C)(C)C)P(CCCP1(C)C)(C)C	[NiH]12(P(CCCP2(C)C)(C)C)P(CCCP1(C)C)(C)C
4	Ni	[HNi(dppe)2]+	14.2	acetonitrile	pyridine	http://dx.doi.org/10.1021/acscatal.7b03396	http://dx.doi.org/10.1021/ja991888y		1314 ; 11436	298		4	[Ni]12(P(CCP2(c2ccccc2)c2ccccc2)(c2ccccc2)c2ccccc2)P(CCP1(c1ccccc1)c1ccccc1)(c1ccccc1)c1ccccc1	[NiH]12(P(CCP2(c2ccccc2)c2ccccc2)(c2ccccc2)c2ccccc2)P(CCP1(c1ccccc1)c1ccccc1)(c1ccccc1)c1ccccc1
5	Ni	[HNi((P(Me))2(N(Ph))2)2]+	22.5	acetonitrile	collidine	http://dx.doi.org/10.1021/acscatal.7b03396%20	https://doi.org/10.1021/cs300019h		1314 ; 723	298		5	[Ni@]12([P@@]3(CN(C[P@]1(CN(C3)c1ccccc1)C)c1ccccc1)C)[P@@]1(CN(C[P@]2(CN(C1)c1ccccc1)C)c1ccccc1)C	[NiH]12([P@@]3(CN(C[P@]1(CN(C3)c1ccccc1)C)c1ccccc1)C)[P@@]1(CN(C[P@]2(CN(C1)c1ccccc1)C)c1ccccc1)C
6	Ni	[HNi((P(Ph))2(N(Me))2)2]+	18.5	acetonitrile	Estimated using E1/2	http://dx.doi.org/10.1021/acscatal.7b03396	https://doi.org/10.1021/ja204489e	https://doi.org/10.1039/B921245K	1314 ; 12778	298		6	[Ni@]12([P@@]3(CN(C[P@]1(CN(C3)C)c1ccccc1)C)c1ccccc1)[P@@]1(CN(C[P@]2(CN(C1)C)c1ccccc1)C)c1ccccc1	[NiH]12([P@@]3(CN(C[P@]1(CN(C3)C)c1ccccc1)C)c1ccccc1)[P@@]1(CN(C[P@]2(CN(C1)C)c1ccccc1)C)c1ccccc1
7	Ni	[HNi((P(Ph))2(N(Bn))2)2]+	19.4	acetonitrile	Estimated using E1/2	http://dx.doi.org/10.1021/acscatal.7b03396	http://dx.doi.org/10.1021/om070143v		1314 ; 3919	298		7	[Ni@]12([P@@]3(CN(C[P@]1(CN(C3)Cc1ccccc1)c1ccccc1)Cc1ccccc1)c1ccccc1)[P@@]1(CN(C[P@]2(CN(C1)Cc1ccccc1)c1ccccc1)Cc1ccccc1)c1ccccc1	[NiH]12([P@@]3(CN(C[P@]1(CN(C3)Cc1ccccc1)c1ccccc1)Cc1ccccc1)c1ccccc1)[P@@]1(CN(C[P@]2(CN(C1)Cc1ccccc1)c1ccccc1)Cc1ccccc1)c1ccccc1
8	Ni	[HNi((P(Ph))2(N(C6H4-OMe))2]+	17.4	acetonitrile	Estimated using E1/2	http://dx.doi.org/10.1021/acscatal.7b03396%20	https://doi.org/10.1021/ja204489e		1314 ; 12778	298		8	[Ni@]12([P@@]3(CN(C[P@]1(CN(C3)c1ccc(cc1)OC)c1ccccc1)c1ccc(cc1)OC)c1ccccc1)[P@@]1(CN(C[P@]2(CN(C1)c1ccc(cc1)OC)c1ccccc1)c1ccc(cc1)OC)c1ccccc1	[NiH]12([P@@]3(CN(C[P@]1(CN(C3)c1ccc(cc1)OC)c1ccccc1)c1ccc(cc1)OC)c1ccccc1)[P@@]1(CN(C[P@]2(CN(C1)c1ccc(cc1)OC)c1ccccc1)c1ccc(cc1)OC)c1ccccc1
9	Ni	[HNi((P(Cy))2(N(Bn-OMe))2]+	22.6	bezonitrile	tetramethylguanidine	http://dx.doi.org/10.1021/acscatal.7b03396%20	http://dx.doi.org/10.1021/om300409y		1314 ; 6729	298		9	[Ni@]12([P@@]3(CN(C[P@]1(CN(C3)Cc1ccc(cc1)OC)C1CCCCC1)Cc1ccc(cc1)OC)C1CCCCC1)[P@@]1(CN(C[P@]2(CN(C1)Cc1ccc(cc1)OC)C1CCCCC1)Cc1ccc(cc1)OC)C1CCCCC1	[NiH]12([P@@]3(CN(C[P@]1(CN(C3)Cc1ccc(cc1)OC)C1CCCCC1)Cc1ccc(cc1)OC)C1CCCCC1)[P@@]1(CN(C[P@]2(CN(C1)Cc1ccc(cc1)OC)C1CCCCC1)Cc1ccc(cc1)OC)C1CCCCC1
10	Ni	[HNi((P(Ph))2(N(Ph))2]+	16.3	acetonitrile	Estimated using E1/2	http://dx.doi.org/10.1021/acscatal.7b03396%20	http://dx.doi.org/10.1021/om070143v		1314 ; 3919	298		10	[Ni@]12([P@@]3(CN(C[P@]1(CN(C3)c1ccccc1)c1ccccc1)c1ccccc1)c1ccccc1)[P@@]1(CN(C[P@]2(CN(C1)c1ccccc1)c1ccccc1)c1ccccc1)c1ccccc1	[NiH]12([P@@]3(CN(C[P@]1(CN(C3)c1ccccc1)c1ccccc1)c1ccccc1)c1ccccc1)[P@@]1(CN(C[P@]2(CN(C1)c1ccccc1)c1ccccc1)c1ccccc1)c1ccccc1
11	Ni	[HNi(dedpe)2]+	20.3	bezonitrile	triethylamine	http://dx.doi.org/10.1021/acscatal.7b03396%20	http://dx.doi.org/10.1021/om0100582		1314 ; 1833	298		11	[Ni]12(P(CCP2(CC)CC)(c2ccccc2)c2ccccc2)P(CCP1(CC)CC)(c1ccccc1)c1ccccc1	[NiH]12(P(CCP2(CC)CC)(c2ccccc2)c2ccccc2)P(CCP1(CC)CC)(c1ccccc1)c1ccccc1
12	Ni	[HNi(dppv)2]+	13.2	acetonitrile	anisidine	http://dx.doi.org/10.1021/acscatal.7b03396%20	http://dx.doi.org/10.1021/om0100582		1314 ; 1833	298		12	[Ni]12(P(CCP2(c2ccccc2)c2ccccc2)(c2ccccc2)c2ccccc2)P(CCP1(c1ccccc1)c1ccccc1)(c1ccccc1)c1ccccc1	[NiH]12(P(CCP2(c2ccccc2)c2ccccc2)(c2ccccc2)c2ccccc2)P(CCP1(c1ccccc1)c1ccccc1)(c1ccccc1)c1ccccc1
13	Ni	[HNi((P(Cy))2(N(Ph))2))((P(Ph))2(N(Ph))2)]+	16.5	acetonitrile	Estimated using E1/2	http://dx.doi.org/10.1021/acscatal.7b03396%20	https://doi.org/10.1021/ja204489e		1314 ; 12778	298		13	[Ni@]12([P@@]3(CN(C[P@]1(CN(C3)c1ccccc1)c1ccccc1)c1ccccc1)c1ccccc1)[P@@]1(CN(C[P@]2(CN(C1)c1ccccc1)C1CCCCC1)c1ccccc1)C1CCCCC1	[NiH]12([P@@]3(CN(C[P@]1(CN(C3)c1ccccc1)c1ccccc1)c1ccccc1)c1ccccc1)[P@@]1(CN(C[P@]2(CN(C1)c1ccccc1)C1CCCCC1)c1ccccc1)C1CCCCC1
14	Ni	[HNi((P(Cy))2(N(Bn))2)2]+	21.2	acetonitrile	Estimated using E1/2	http://dx.doi.org/10.1021/acscatal.7b03396%20	http://dx.doi.org/10.1021/om070143v		1314 ; 3920	298		14	[Ni@]12([P@@]3(CN(C[P@]1(CN(C3)Cc1ccccc1)C1CCCCC1)Cc1ccccc1)C1CCCCC1)[P@@]1(CN(C[P@]2(CN(C1)Cc1ccccc1)C1CCCCC1)Cc1ccccc1)C1CCCCC1	[NiH]12([P@@]3(CN(C[P@]1(CN(C3)Cc1ccccc1)C1CCCCC1)Cc1ccccc1)C1CCCCC1)[P@@]1(CN(C[P@]2(CN(C1)Cc1ccccc1)C1CCCCC1)Cc1ccccc1)C1CCCCC1
15	Ni	[HNi((P(Cy))2(N(t-Bu))2)2]+	24.6	acetonitrile	[H-MTBD]BF4	http://dx.doi.org/10.1021/acscatal.7b03396%20	http://dx.doi.org/10.1021/ja400705a		1314 ; 9703	298		15	[Ni@]12([P@@]3(CN(C[P@]1(CN(C3)C(C)(C)C)C1CCCCC1)C(C)(C)C)C1CCCCC1)[P@@]1(CN(C[P@]2(CN(C1)C(C)(C)C)C1CCCCC1)C(C)(C)C)C1CCCCC1	[NiH]12([P@@]3(CN(C[P@]1(CN(C3)C(C)(C)C)C1CCCCC1)C(C)(C)C)C1CCCCC1)[P@@]1(CN(C[P@]2(CN(C1)C(C)(C)C)C1CCCCC1)C(C)(C)C)C1CCCCC1
16	Ni	[HNi((P(Cy))2(N(Ph))2)2]+	17.3	acetonitrile	Estimated using E1/2	http://dx.doi.org/10.1021/acscatal.7b03396%20	https://doi.org/10.1021/ja204489e		1314 ; 12778	298		16	[Ni@]12([P@@]3(CN(C[P@]1(CN(C3)c1ccccc1)C1CCCCC1)c1ccccc1)C1CCCCC1)[P@@]1(CN(C[P@]2(CN(C1)c1ccccc1)C1CCCCC1)c1ccccc1)C1CCCCC1	[NiH]12([P@@]3(CN(C[P@]1(CN(C3)c1ccccc1)C1CCCCC1)c1ccccc1)C1CCCCC1)[P@@]1(CN(C[P@]2(CN(C1)c1ccccc1)C1CCCCC1)c1ccccc1)C1CCCCC1
17	Ni	[HNi(depp)2]+	23.3	acetonitrile	tetramethylguanidine	http://dx.doi.org/10.1021/acscatal.7b03396	http://dx.doi.org/10.1021/ja0116829		1314 ; 1921	298		17	[Ni]12(P(CCCP2(CC)CC)(CC)CC)P(CCCP1(CC)CC)(CC)CC	[NiH]12(P(CCCP2(CC)CC)(CC)CC)P(CCCP1(CC)CC)(CC)CC
18	Ni	[HNi(PNP)2]+	22.2	acetonitrile	Estimated using E1/2	http://dx.doi.org/10.1021/acscatal.7b03396	http://dx.doi.org/10.1021/om070143v		1314 ; 3921	298	PNP = Et2PCH2N(Me)CH2PEt2	18	[Ni]12(P(CN(CP2(CC)CC)C)(CC)CC)P(CN(CP1(CC)CC)C)(CC)CC	[NiH]12(P(CN(CP2(CC)CC)C)(CC)CC)P(CN(CP1(CC)CC)C)(CC)CC
19	Ni	[HNi(dppp)(P(Ph))2(N(Bn))2]+	18	bezonitrile	Estimated using E1/2	http://dx.doi.org/10.1021/acscatal.7b03396	https://doi.org/10.1021/ja204489e	https://doi.org/10.1021/ja900483x	1314 ; 12771 ; 5939	298		19	[Ni@@]12(P(CCCP2(c2ccccc2)c2ccccc2)(c2ccccc2)c2ccccc2)[P@]2(CN(C[P@@]1(CN(C2)Cc1ccccc1)c1ccccc1)Cc1ccccc1)c1ccccc1	[NiH]12(P(CCCP2(c2ccccc2)c2ccccc2)(c2ccccc2)c2ccccc2)[P@]2(CN(C[P@@]1(CN(C2)Cc1ccccc1)c1ccccc1)Cc1ccccc1)c1ccccc1
20	Pt	[HPt(dmpe)2]+	31.1	bezonitrile	tetramethylguanidine	http://dx.doi.org/10.1021/acscatal.7b03396	http://dx.doi.org/10.1021/ja991888y	http://dx.doi.org/10.1021/ja0116829	1314 ; 11439 ; 1921	298		20	[Pt]12(P(CCP2(C)C)(C)C)P(CCP1(C)C)(C)C	[PtH]12(P(CCP2(C)C)(C)C)P(CCP1(C)C)(C)C
21	Pt	[HPt(depe)2]+	29.7	bezonitrile	tetramethylguanidine	http://dx.doi.org/10.1021/acscatal.7b03396	http://dx.doi.org/10.1021/ja991888y	http://dx.doi.org/10.1021/ja0116829	1315 ; 11439 ; 1921	298		21	[Pt]12(P(CCP2(CC)CC)(CC)CC)P(CCP1(CC)CC)(CC)CC	[PtH]12(P(CCP2(CC)CC)(CC)CC)P(CCP1(CC)CC)(CC)CC
22	Pt	[HPt(dmpp)2]+	30.4	bezonitrile	tetramethylguanidine	http://dx.doi.org/10.1021/acscatal.7b03396	http://dx.doi.org/10.1021/ja991888y	http://dx.doi.org/10.1021/ja0116829	1315 ; 11439 ; 1921	298		22	[Pt]12(P(CCCP2(C)C)(C)C)P(CCCP1(C)C)(C)C	[PtH]12(P(CCCP2(C)C)(C)C)P(CCCP1(C)C)(C)C
23	Pt	[HPt(dppe)2]+	22	acetonitrile	triethylamine	http://dx.doi.org/10.1021/acscatal.7b03396	http://dx.doi.org/10.1021/ja991888y		1315 ; 11435	298		23	[Pt]12(P(CCP2(c2ccccc2)c2ccccc2)(c2ccccc2)c2ccccc2)P(CCP1(c1ccccc1)c1ccccc1)(c1ccccc1)c1ccccc1	[PtH]12(P(CCP2(c2ccccc2)c2ccccc2)(c2ccccc2)c2ccccc2)P(CCP1(c1ccccc1)c1ccccc1)(c1ccccc1)c1ccccc1
24	Pd	[HPd(depe)2]+	23.2	acetonitrile	tetramethylguanidine	http://dx.doi.org/10.1021/acscatal.7b03396	https://doi.org/10.1021/ja0395240		1315 ; 5508	298		24	P1(CCP(CC)(CC)[Pd]21P(CCP2(CC)CC)(CC)CC)(CC)CC	P1(CCP(CC)(CC)[PdH]21P(CCP2(CC)CC)(CC)CC)(CC)CC
25	Pd	[HPd(PNP)2]+	22.1	acetonitrile	Estimated using E1/2	http://dx.doi.org/10.1021/acscatal.7b03396	http://dx.doi.org/10.1021/om0342816		1315 ; 513	298	PNP = Et2PCH2N(Me)CH2PEt2	25	P1(CN(CP(CC)(CC)[Pd]21P(CN(CP2(CC)CC)C)(CC)CC)C)(CC)CC	P1(CN(CP(CC)(CC)[PdH]21P(CN(CP2(CC)CC)C)(CC)CC)C)(CC)CC
26	Pt	[HPt(PNP)2]+	27.6	acetonitrile	Estimated using E1/2	http://dx.doi.org/10.1021/acscatal.7b03396	http://dx.doi.org/10.1021/om0342816		1315 ; 513	298	PNP = Et2PCH2N(Me)CH2PEt2	26	P1(CN(CP(CC)(CC)[Pt]21P(CN(CP2(CC)CC)C)(CC)CC)C)(CC)CC	P1(CN(CP(CC)(CC)[PtH]21P(CN(CP2(CC)CC)C)(CC)CC)C)(CC)CC
27	Pd	[HPd(depp)2]+	22.9	acetonitrile	tetramethylguanidine	http://dx.doi.org/10.1021/acscatal.7b03396	https://doi.org/10.1021/ja0395240		1315 ; 5508	298		27	P1(CCCP(CC)(CC)[Pd]21P(CCCP2(CC)CC)(CC)CC)(CC)CC	P1(CCCP(CC)(CC)[PdH]21P(CCCP2(CC)CC)(CC)CC)(CC)CC
28	Pd	[HPd(depx)2]+	19.8	acetonitrile	triethylamine	http://dx.doi.org/10.1021/acscatal.7b03396	https://doi.org/10.1021/ja0395240		1315 ; 5508	298		28	[Pd]12(P(Cc3c(CP1(CC)CC)cccc3)(CC)CC)P(Cc1c(CP2(CC)CC)cccc1)(CC)CC	[PdH]12(P(Cc3c(CP1(CC)CC)cccc3)(CC)CC)P(Cc1c(CP2(CC)CC)cccc1)(CC)CC
29	Pd	[HPd(depPE)2]+	18.3	acetonitrile	triethylamine	http://dx.doi.org/10.1021/acscatal.7b03396	https://doi.org/10.1021/ja0395240		1315 ; 5508	298		29	[Pd]12(P(c3ccccc3Oc3c(P1(CC)CC)cccc3)(CC)CC)P(c1c(cccc1)Oc1c(P2(CC)CC)cccc1)(CC)CC	[PdH]12(P(c3ccccc3Oc3c(P1(CC)CC)cccc3)(CC)CC)P(c1c(cccc1)Oc1c(P2(CC)CC)cccc1)(CC)CC
30	Pd	[HPd(EtXantphos)2]+	18.5	acetonitrile	triethylamine	http://dx.doi.org/10.1021/acscatal.7b03396	https://doi.org/10.1021/ja0395240		1315 ; 5508	298		30	[Pd]12(P(c3cccc4c3Oc3c(P1(CC)CC)cccc3C4(C)C)(CC)CC)P(c1c3c(ccc1)C(c1c(c(P2(CC)CC)ccc1)O3)(C)C)(CC)CC	[PdH]12(P(c3cccc4c3Oc3c(P1(CC)CC)cccc3C4(C)C)(CC)CC)P(c1c3c(ccc1)C(c1c(c(P2(CC)CC)ccc1)O3)(C)C)(CC)CC
31	Rh	HRh((P(Ph))2(N(Bn))2)2	44.8	bezonitrile	Verkade's base	http://dx.doi.org/10.1021/acscatal.7b03396	https://doi.org/10.1021/jacs.5b04291		1315 ; 8255	298		31	[P@]12(CN(C[P@@](CN(C1)Cc1ccccc1)([Rh@]12[P@@]2(CN(C[P@]1(CN(C2)Cc1ccccc1)c1ccccc1)Cc1ccccc1)c1ccccc1)c1ccccc1)Cc1ccccc1)c1ccccc1	[P@]12(CN(C[P@@](CN(C1)Cc1ccccc1)([RhH]12[P@@]2(CN(C[P@]1(CN(C2)Cc1ccccc1)c1ccccc1)Cc1ccccc1)c1ccccc1)c1ccccc1)Cc1ccccc1)c1ccccc1
32	Rh	HRh(P(Ph))2(N(PhOMe))2)2	39.4	bezonitrile	Verkade's base	http://dx.doi.org/10.1021/acscatal.7b03396	https://doi.org/10.1021/jacs.5b04291		1315 ; 8255	298		32	[P@]12(CN(C[P@@](CN(C1)c1ccc(cc1)OC)([Rh@]12[P@@]2(CN(C[P@]1(CN(C2)c1ccc(cc1)OC)c1ccccc1)c1ccc(cc1)OC)c1ccccc1)c1ccccc1)c1ccc(cc1)OC)c1ccccc1	[P@]12(CN(C[P@@](CN(C1)c1ccc(cc1)OC)([RhH]12[P@@]2(CN(C[P@]1(CN(C2)c1ccc(cc1)OC)c1ccccc1)c1ccc(cc1)OC)c1ccccc1)c1ccccc1)c1ccc(cc1)OC)c1ccccc1
33	Rh	HRh(P(Cy))2(N(Ph))2)2	46	bezonitrile	Verkade's base	http://dx.doi.org/10.1021/acscatal.7b03396	https://doi.org/10.1021/jacs.5b04291		1315 ; 8255	298		33	[P@]12(CN(C[P@@](CN(C1)c1ccccc1)([Rh@]12[P@@]2(CN(C[P@]1(CN(C2)c1ccccc1)C1CCCCC1)c1ccccc1)C1CCCCC1)C1CCCCC1)c1ccccc1)C1CCCCC1	[P@]12(CN(C[P@@](CN(C1)c1ccccc1)([RhH]12[P@@]2(CN(C[P@]1(CN(C2)c1ccccc1)C1CCCCC1)c1ccccc1)C1CCCCC1)C1CCCCC1)c1ccccc1)C1CCCCC1
34	Rh	HRh((P(Cy))2(N(PhOMe)2)2	49.9	bezonitrile	Verkade's base	http://dx.doi.org/10.1021/acscatal.7b03396	https://doi.org/10.1021/jacs.5b04291		1315 ; 8255	298		34	[P@]12(CN(C[P@@](CN(C1)c1ccc(cc1)OC)([Rh@]12[P@@]2(CN(C[P@]1(CN(C2)c1ccc(cc1)OC)C1CCCCC1)c1ccc(cc1)OC)C1CCCCC1)C1CCCCC1)c1ccc(cc1)OC)C1CCCCC1	[P@]12(CN(C[P@@](CN(C1)c1ccc(cc1)OC)([RhH]12[P@@]2(CN(C[P@]1(CN(C2)c1ccc(cc1)OC)C1CCCCC1)c1ccc(cc1)OC)C1CCCCC1)C1CCCCC1)c1ccc(cc1)OC)C1CCCCC1
35	Rh	HRh(dppb)2	35	acetonitrile	bromoaniline	http://dx.doi.org/10.1021/acscatal.7b03396	https://doi.org/10.1021/om020421k		1315 ; 4825	298		35	[Rh]12(P(c3c(P1(c1ccccc1)c1ccccc1)cccc3)(c1ccccc1)c1ccccc1)P(c1ccccc1P2(c1ccccc1)c1ccccc1)(c1ccccc1)c1ccccc1	[RhH]12(P(c3c(P1(c1ccccc1)c1ccccc1)cccc3)(c1ccccc1)c1ccccc1)P(c1ccccc1P2(c1ccccc1)c1ccccc1)(c1ccccc1)c1ccccc1
36	Ru	[HRu(?6-C6Me6)(bpy)]+	22.5	acetonitrile	tetramethylguanidine	http://dx.doi.org/10.1021/acscatal.7b03396	https://doi.org/10.1021/ja302937q		1315 ; 15749	298		36	[Ru]123(n4c(=c5n1cccc5)cccc4)[C@]1([C]([C@@]2([C]([C@@]3([C]1C)C)C)C)C)C	[RuH]12(N3C(=CCC=C3)C3=CCC=CN13)[C@]1(C(=C([C]([C@@]2([C]1C)C)C)C)C)C
37	Ru	[HRu(tpy)(bpy)]+	32	acetonitrile	proazaphosphatranes	http://dx.doi.org/10.1021/acscatal.7b03396	https://doi.org/10.1021/ja302937q	reference base has a pKa of 32.9 acetonitrile	1315 ; 15749	298		37	[Ru]123(N4C=CCC=C4C4=CCC=CN14)N1C=CC=C[C@H]1C1=CCC=C(N21)[C@H]1N3C=CC=C1	[RuH]123(N4C=CCC=C4C4=CCC=CN14)N1C=CCC=C1C1=CCC=C(N21)C1=CCC=CN31
38	Co	[H2Co(dppe)2]+	22.8	acetonitrile	tetramethylguanidine	http://dx.doi.org/10.1021/acscatal.7b03396	https://doi.org/10.1021/ja0122804		1315 ; 2988	298		38	[CoH]12(P(CCP1(c1ccccc1)c1ccccc1)(c1ccccc1)c1ccccc1)P(CCP2(c1ccccc1)c1ccccc1)(c1ccccc1)c1ccccc1	[CoH2]12(P(CCP1(c1ccccc1)c1ccccc1)(c1ccccc1)c1ccccc1)P(CCP2(c1ccccc1)c1ccccc1)(c1ccccc1)c1ccccc1
39	Co	HCo(dppe)2	38.1	acetonitrile	Thermodynamic cycle	http://dx.doi.org/10.1021/acscatal.7b03396	https://doi.org/10.1021/ja0122804	thermodynamic cycle based upon the 2 pKa values calculated in the paper	1315 ; 2988	298	thermodynamic cycle based upon the 2 pKa values calculated in the paper	39	[Co]12(P(CCP1(c1ccccc1)c1ccccc1)(c1ccccc1)c1ccccc1)P(CCP2(c1ccccc1)c1ccccc1)(c1ccccc1)c1ccccc1	[CoH]12(P(CCP1(c1ccccc1)c1ccccc1)(c1ccccc1)c1ccccc1)P(CCP2(c1ccccc1)c1ccccc1)(c1ccccc1)c1ccccc1
40	Co	[HCo(dppe)2]+	23.6	acetonitrile	Thermodynamic cycle	http://dx.doi.org/10.1021/acscatal.7b03396	https://doi.org/10.1021/ja0122804	'	1315 ; 2988	298	thermodynamic cycle based upon the 2 pKa values calculated in the paper	40	[Co]12(P(CCP1(c1ccccc1)c1ccccc1)(c1ccccc1)c1ccccc1)P(CCP2(c1ccccc1)c1ccccc1)(c1ccccc1)c1ccccc1	[CoH]12(P(CCP1(c1ccccc1)c1ccccc1)(c1ccccc1)c1ccccc1)P(CCP2(c1ccccc1)c1ccccc1)(c1ccccc1)c1ccccc1
41	Ir	[HCp*Ir(bpy)]+	23.3	acetonitrile	DBU	http://dx.doi.org/10.1021/acscatal.7b03396	https://doi.org/10.1021/ja508762g		1315 ; S13	298		41	[Ir@]12(n3c(=c4n1cccc4)cccc3)[C@]1([C]([C@@]2(C(=C1C)C)C)C)C	[IrH]12(N3C(=CCC=C3)C3=CCC=CN13)[C@]1([C]([C@@]2(C(=C1C)C)C)C)C
42	Co	[HCo(Cp)(dppe)]+	18.4	acetonitrile	triethylamine	http://dx.doi.org/10.1021/acscatal.7b03396	https://doi.org/10.1021/jacs.6b10148		1315 ; SI-34	298		42	[Co]12(P(CCP1(c1ccccc1)c1ccccc1)(c1ccccc1)c1ccccc1)[C@H]1[CH][C@@H]2C=C1	[CoH]1[C@H]2[CH][C@@H]1C=C2.P(CCP(c1ccccc1)c1ccccc1)(c1ccccc1)c1ccccc1
43	Co	[HCo(Cp(C5F4N))(P(tBu))2(N(Ph))2]+	15.6	bezonitrile	BnNH3+	http://dx.doi.org/10.1021/acscatal.7b03396	https://doi.org/10.1021/om5004607		1315 ; 5831	298		43	[Co]1[C@H]2[C]([C@@H]1C=C2)c1[c][c]n[c][c]1.P1(CN(CP(CN(C1)c1ccccc1)C(C)(C)C)c1ccccc1)C(C)(C)C	[CoH]1[C@H]2[C]([C@@H]1C=C2)c1[c][c]n[c][c]1.P1(CN(CP(CN(C1)c1ccccc1)C(C)(C)C)c1ccccc1)C(C)(C)C
44	Co	[HCo(dppe)2(CH3CN)]+2	11.3	acetonitrile	anisidine	http://dx.doi.org/10.1021/acscatal.7b03396	https://doi.org/10.1021/ja0122804		1315 ; 2988	298		44	[Co]12([N][C]C)(P(CCP1(c1ccccc1)c1ccccc1)(c1ccccc1)c1ccccc1)P(CCP2(c1ccccc1)c1ccccc1)(c1ccccc1)c1ccccc1	[CoH]12([N][C]C)(P(CCP1(c1ccccc1)c1ccccc1)(c1ccccc1)c1ccccc1)P(CCP2(c1ccccc1)c1ccccc1)(c1ccccc1)c1ccccc1
45	Cr	HCpCr(CO)3	13.3	acetonitrile	pyridine	https://doi.org/10.1021/ja00369a019			1259	298		45	[Cr]1([C][O])([C][O])([C][O])[C@@H]2[CH][C@H]1C=C2	[CrH]123([C@@H]4C=C[C@H]1[CH]4)C(=O)[C@]3(C2=O)[O]
46	Mo	HCpMo(CO)3	13.9	acetonitrile	pyridine	https://doi.org/10.1021/ja00369a019			1259	T = 273 K		46	[C@@H]12C=C[C@@H]([CH]1)[Mo]2([C][O])([C][O])[C][O]	[C@@H]12C=C[C@@H]([CH]1)[MoH]132C(=O)[C@]3(C1=O)[O]
47	W	HCpW(CO)3	16.1	acetonitrile	morpholine	https://doi.org/10.1021/ja00369a019			1259	298		47	[C@@H]12C=C[C@@H]([CH]1)[W]2([C][O])([C][O])[C][O]	[C@@H]12C=C[C@@H]([CH]1)[WH]132C(=O)[C@]3(C1=O)[O]
48	Os	H2cis-Os(CO)4	20.8	acetonitrile	triethylamine	https://doi.org/10.1021/ja00369a019			1259	298		48	[OsH]([C][O])([C][O])([C][O])[C][O]	[OsH2]([C][O])([C][O])([C][O])[C][O]
49	Os	Hcis-Os(CO)4(CH3)	23	acetonitrile	tetramethylguanidine	https://doi.org/10.1021/ja00369a019			1259	T = 273 K		49	[Os]([C][O])([C][O])([C][O])([C][O])C	[OsH]([C][O])([C][O])([C][O])([C][O])C
50	Os	Os2(CO)8H2	20.4	acetonitrile	triethylamine	https://doi.org/10.1021/ja00369a019			1259	298		50	[OsH]([C][O])([C][O])([C][O])([C][O])[Os]([C][O])([C][O])([C][O])[C][O]	[OsH]([C][O])([C][O])([C][O])([C][O])[OsH]([C][O])([C][O])([C][O])[C][O]
51	Co	HCo(CO)4	8.3	acetonitrile	p-(trifluormethyl)aniline	https://doi.org/10.1021/ja00269a022			2261	T = 253 K		51	[Co]([C][O])([C][O])([C][O])[C][O]	[CoH]([C][O])([C][O])([C][O])[C][O]
52	Co	HCo(CO)3P(OPh)3	11.3	acetonitrile	anisidine	https://doi.org/10.1021/ja00269a022			2261	298		52	[Co]([C][O])([C][O])([C][O])P(Oc1ccccc1)(Oc1ccccc1)Oc1ccccc1	[CoH]([C][O])([C][O])([C][O])P(Oc1ccccc1)(Oc1ccccc1)Oc1ccccc1
53	Fe	H2Fe(CO)4	11.4	acetonitrile	aniline	https://doi.org/10.1021/ja00269a022			2261	T = 253 K		53	[FeH]([C][O])([C][O])([C][O])[C][O]	[FeH2]([C][O])([C][O])([C][O])[C][O]
54	Mn	HMn(CO)5	15.1	acetonitrile	morpholine	https://doi.org/10.1021/ja00269a022			2261	298		54	[Mn]([C][O])([C][O])([C][O])([C][O])[C][O]	[MnH]([C][O])([C][O])([C][O])([C][O])[C][O]
55	Co	HCo(CO)3PPh3	15.4	acetonitrile	morpholine	https://doi.org/10.1021/ja00269a022			2261	298		55	[Co]([C][O])([C][O])([C][O])P(c1ccccc1)(c1ccccc1)c1ccccc1	[CoH]([C][O])([C][O])([C][O])P(c1ccccc1)(c1ccccc1)c1ccccc1
56	Mo	HCp*Mo(CO)3	17.1	acetonitrile	morpholine	https://doi.org/10.1021/ja00269a022			2261	298		56	[Mo]1([C@@]2(C(=C([C@]1([C]2C)C)C)C)C)([C][O])([C][O])[C][O]	[MoH]12([C@@]3(C(=C(C(=C3C)C)C)C)C)C(=O)[C@@]2(C1=O)[O]
57	Ru	H2Ru(CO)4	18.7	acetonitrile	morpholine	https://doi.org/10.1021/ja00269a022			2261	298		57	[RuH]([C][O])([C][O])([C][O])[C][O]	[RuH2]([C][O])([C][O])([C][O])[C][O]
60	Re	HRe(CO)5	21.1	acetonitrile	triethylamine, tetramethylguanidine (averaged)	https://doi.org/10.1021/ja00269a022			2261	298		60	[Re]([C][O])([C][O])([C][O])([C][O])[C][O]	[ReH]([C][O])([C][O])([C][O])([C][O])[C][O]
62	W	HCpW(CO)2(PMe3)	26.6	acetonitrile	potassium phenolate	https://doi.org/10.1021/ja00269a022			2261	298		62	[W]([C][O])([C][O])([C@H]1[CH]C=C[CH]1)P(C)(C)C	[WH]1(C(=O)C1=O)[C@@H]1[CH]C=C[CH]1.P(C)(C)C
63	Re	H2CpRe(CO)2	23	acetonitrile	tetramethylguanidine	https://doi.org/10.1021/om00099a013			1985	298		63	[ReH]([C@H]1[CH]C=C[CH]1)([C][O])[C][O]	[ReH2]([C@@H]1C=CC=C1)([C][O])[C][O]
64	Mn	HMn(CO)4(PPh3)	20.4	acetonitrile	triethylamine	https://doi.org/10.1021/om00099a013			1985	298		64	[Mn]([C][O])([C][O])([C][O])([C][O])P(c1ccccc1)(c1ccccc1)c1ccccc1	[MnH]([C][O])([C][O])([C][O])([C][O])P(c1ccccc1)(c1ccccc1)c1ccccc1
65	Mn	HMn(CO)4(PEtPh2)	21.6	acetonitrile	pyrrolidine	https://doi.org/10.1021/om00099a013			1985	298		65	[Mn]([C][O])([C][O])([C][O])([C][O])P(c1ccccc1)(c1ccccc1)CC	[MnH]([C][O])([C][O])([C][O])([C][O])P(c1ccccc1)(c1ccccc1)CC
66	Mn	(eta3-C6H9)Mn(CO)3	22.2	acetonitrile	tetramethylguanidine	https://doi.org/10.1021/om00099a013			1985	298	ligand pKa	66	[Mn]1([C][O])([C][O])([C][O])[C@@H]2[CH]C[C@H]1C[CH]2	[Mn]([C][O])([C][O])([C][O])C1[CH]CCC[CH]1
67	Mn	H(eta6-C6H6)Mn(CO)2	26.8	acetonitrile	phenoxide	https://doi.org/10.1021/om00099a013			1985	298		67	[Mn]1([C@H]2C=C[C@@H]1C=C2)([C][O])[C][O]	[MnH]([C@@H]1C=CC=C[CH]1)([C][O])[C][O]
68	Fe	(mu-H)2Fe3(CO)9(mu3-P-4-C6H4OCH3)	9	acetonitrile	bromoaniline, chloroaniline, cyanoaniline	https://doi.org/10.1021/om00099a013			1985	298		68	[Fe]12([P@@](c3ccc(cc3)OC)([Fe]1([C][O])([C][O])[C][O])[FeH]2([C][O])([C][O])[C][O])([C][O])([C][O])[C][O]	[Fe]1(P(c2ccc(cc2)OC)([Fe]1([C][O])([C][O])[C][O])[FeH2]([C][O])([C][O])[C][O])([C][O])([C][O])[C][O]
69	Fe	(mu-H)2Fe3(CO)9(mu3-P-t-Bu)	11.4	acetonitrile	aniline	https://doi.org/10.1021/om00099a013			1985	298		69	[Fe]1([Fe]2([FeH]([P@@]12C(C)(C)C)([C][O])([C][O])[C][O])([C][O])([C][O])[C][O])([C][O])([C][O])[C][O]	[Fe]1([Fe](P1([FeH2]([C][O])([C][O])[C][O])C(C)(C)C)([C][O])([C][O])[C][O])([C][O])([C][O])[C][O]
70	Fe	(mu-H)2Fe3(CO)9(mu3-S-C6H11)	16.9	acetonitrile	morpholine	https://doi.org/10.1021/om00099a013			1985	298		70	[Fe]12([Fe]3([Fe]1([C][O])([C][O])([C][O])S23C1CCCCC1)([C][O])([C][O])[C][O])([C][O])([C][O])[C][O]	[Fe]12([FeH]([C][O])([C][O])([C][O])[S@@]2([Fe]1([C][O])([C][O])[C][O])C1CCCCC1)([C][O])([C][O])[C][O]
71	Ru	H4Ru4(CO)11[P(OCH3)3]	12.4	acetonitrile	aniline	https://doi.org/10.1021/om00099a013			1985	298		71	[Ru]([C][O])([C][O])[C][O].[RuH]([RuH]([C][O])([C][O])[C][O])([RuH](P(OC)(OC)OC)([C][O])[C][O])([C][O])([C][O])[C][O]	[RuH]([C][O])([C][O])[C][O].[RuH2]([C][O])([C][O])[C][O].[RuH]([C][O])([C][O])[C][O].[Ru](P(OC)(OC)OC)([C][O])[C][O]
72	Ru	H4Ru4(CO)10[P(OCH3)3]2	15.4	acetonitrile	pyridine	https://doi.org/10.1021/om00099a013			1985	298		72	[RuH2]([C][O])([C][O])[C][O].[Ru]([C][O])([C][O])(P(OC)(OC)OC)[RuH]([C][O])([C][O])([C][O])[Ru]([C][O])([C][O])P(OC)(OC)OC	[RuH2]([C][O])([C][O])[C][O].[Ru](P(OC)(OC)OC)([C][O])[C][O].[RuH2]([C][O])([C][O])[C][O].[Ru](P(OC)(OC)OC)([C][O])[C][O]
73	Ru	[(PNP)Ru(CO)(H)]+	20.7	THF	t-Butyliminotri(pyrrolidino)phosphorene ? tetrafluoroboric acid	https://doi.org/10.1021/jacs.9b06760			14322 or S13	298	ligand pKa	73	[RuH]12([C][O])P(Cc3n2c(=CP1(C(C)(C)C)C(C)(C)C)ccc3)(C(C)(C)C)C(C)(C)C	[RuH]12([C][O])P(CC3=CCC=C(N23)CP1(C(C)(C)C)C(C)(C)C)(C(C)(C)C)C(C)(C)C
74	Ru	(PNP)Ru(CO)(H)-(CO2)	24.6	THF	P2Et?BF4	https://doi.org/10.1021/jacs.9b06760			14322 or S14	298	ligand pKa	74	[RuH]123([C][O])P(C=c4n2c(ccc4)[C@H](P1(C(C)(C)C)C(C)(C)C)C(=O)O3)(C(C)(C)C)C(C)(C)C	[RuH]123([C][O])P(CC4=CCC=C(N24)[C@H](P1(C(C)(C)C)C(C)(C)C)C(=O)O3)(C(C)(C)C)C(C)(C)C
75	Fe	HCpFe(CO)2	27.1	acetonitrile	TBD	https://doi.org/10.1021/om2001519			3446	298		75	[Fe]([C@@H]1C=CC=C1)([C][O])[C][O]	[FeH]1([C@@H]2[CH][C@H]1C=C2)([C][O])[C][O]
76	Ru	HCpRu(CO)2	28.3	acetonitrile	TBD	https://doi.org/10.1021/om2001519			3446	298		76	[C@@H]12C=C[C@@H]([CH]1)[Ru]2([C][O])[C][O]	[C@@H]12[CH][C@@H](C=C1)[RuH]2([C][O])[C][O]
77	Os	HCpOs(CO)2	32.7	acetonitrile	Verkade's base	https://doi.org/10.1021/om2001519			3446	298		77	C1=C[C@H](C=C1)[Os]([C][O])[C][O]	[C@@H]12C=C[C@@H]([CH]1)[OsH]2([C][O])[C][O]
78	Fe	HCp*Fe(CO)2	29.7	acetonitrile	phenolate	https://doi.org/10.1021/om2001519			3446	298		78	[Fe]([C@@]1(C(=C(C(=C1C)C)C)C)C)([C][O])[C][O]	[FeH]([C@]1(C(=C(C(=C1C)C)C)C)C)([C][O])[C][O]
79	W	[(mu-H)W2(CO)6((eta5-C5H3)2(SiMe2)2)]+	-1.6	CD2Cl2	DMSO	https://doi.org/10.1021/acs.chemrev.5b00695	https://doi.org/10.1021/om010861w		8595 ; 1238	298		79	C1=C[C@@]2(C(=C1)[Si](C)(C)[C@@]1(C=CC=C1[Si]2(C)C)[W]([C][O])([C][O])[C][O])[W]([C][O])([C][O])[C][O]	C1=C[C@]2(C(=C1)[Si](C)(C)[C@@]1(C(=CC=C1)[Si]2(C)C)[WH]([C][O])([C][O])[C][O])[W]([C][O])([C][O])[C][O]
80	W	[HW(CO)3(PEtPh2)3]+	-0.3	DCE	Estimated using enthalpy of protonation (ref of enthalpy: CF3SO3H)	https://doi.org/10.1021/acs.chemrev.5b00695	https://doi.org/10.1021/ja410718r	https://doi.org/10.1021/ja9441930	8595 ; 1954 ; 937	298		80	[W](P(CC)(c1ccccc1)c1ccccc1)(P(c1ccccc1)(c1ccccc1)CC)([C][O])([C][O])([C][O])P(c1ccccc1)(c1ccccc1)CC	[WH]1(P(CC)(c2ccccc2)c2ccccc2)(P(c2ccccc2)(c2ccccc2)CC)(C(=O)C1=O)[C][O].P(c1ccccc1)(c1ccccc1)CC
81	W	[HW(CO)3(PMePh2)3]+	-1.3	DCE	Estimated using enthalpy of protonation (ref of enthalpy: CF3SO3H)	https://doi.org/10.1021/acs.chemrev.5b00695	https://doi.org/10.1021/ja410718r	https://doi.org/10.1021/ja9441930	8595 ; 1954 ; 937	298		81	[W](P(C)(c1ccccc1)c1ccccc1)(P(c1ccccc1)(c1ccccc1)C)([C][O])([C][O])([C][O])P(c1ccccc1)(c1ccccc1)C	[W].P(C)(c1ccccc1)c1ccccc1.P(c1ccccc1)(c1ccccc1)C.[C]=O.[CH]=O.[C]=O.P(c1ccccc1)(c1ccccc1)C
82	W	[HW(CO)3(triphos)]+	-0.4	DCE	Estimated using enthalpy of protonation (ref of enthalpy: CF3SO3H)	https://doi.org/10.1021/acs.chemrev.5b00695	https://doi.org/10.1021/ja410718r	https://doi.org/10.1021/ja9441930	8595 ; 1954 ; 937	298		82	[W]12(P(CCP1(CCP2(c1ccccc1)c1ccccc1)c1ccccc1)(c1ccccc1)c1ccccc1)([C][O])([C][O])[C][O]	[WH]1([P@](CCP1(c1ccccc1)c1ccccc1)(CCP(c1ccccc1)c1ccccc1)c1ccccc1)([C][O])([C][O])[C][O]
83	W	[HW(CO)3(tripod)]+	-3.9	DCE	Estimated using enthalpy of protonation (ref of enthalpy: CF3SO3H)	https://doi.org/10.1021/acs.chemrev.5b00695	https://doi.org/10.1021/ja410718r	https://doi.org/10.1021/ja9441930	8595 ; 1954 ; 937	298		83	[W]12(P(C[C@](CP1(c1ccccc1)c1ccccc1)(CP2(c1ccccc1)c1ccccc1)C)(c1ccccc1)c1ccccc1)([C][O])([C][O])[C][O]	[WH]12(P(CC(CP(c3ccccc3)c3ccccc3)(CP1(c1ccccc1)c1ccccc1)C)(c1ccccc1)c1ccccc1)(C(=O)C2=O)[C][O]
84	W	[HW(CO)3(bpy)(PPh2Me)]+	1	DCE	Estimated using enthalpy of protonation (ref of enthalpy: CF3SO3H)	https://doi.org/10.1021/acs.chemrev.5b00695	https://doi.org/10.1021/ja410718r	https://doi.org/10.1021/ja9441930	8596 ; 1954 ; 937	298		84	[W]1(N2C=CCC=C2C2=CCC=CN12)(P(c1ccccc1)(c1ccccc1)C)([C][O])([C][O])[C][O]	[WH]12(N3C=CCC=C3C3=CCC=CN13)([C][O])C(=O)C2=O.P(c1ccccc1)(c1ccccc1)C
85	W	[H2CpW(CO)2(PMe)3]+	5.6	acetonitrile	chloroanilinium, cyanoanilinium, carboethoxyanilinum	https://doi.org/10.1021/acs.chemrev.5b00695	https://doi.org/10.1021/ja002395s		8595 ; 12238	298		85	[WH]1([C@H]2[CH]C=C[CH]2)C(=O)C1=O.P(C)(C)C	[WH2]([C@H]1[CH]C=C[CH]1)([C][O])[C][O].P(C)(C)C
86	W	[HW(CO)3(PPhEt2)3]+	0.5	DCE	Estimated using enthalpy of protonation (ref of enthalpy: CF3SO3H)	https://doi.org/10.1021/acs.chemrev.5b00695	https://doi.org/10.1021/ja410718r	https://doi.org/10.1021/ja9441930	8595 ; 1954 ; 937	298		86	[W]([C][O])([C][O])([C][O])(P(c1ccccc1)(c1ccccc1)CC)(P(c1ccccc1)(c1ccccc1)CC)P(c1ccccc1)(c1ccccc1)CC	[WH]1(C(=O)C1=O)([C][O])(P(c1ccccc1)(c1ccccc1)CC)P(c1ccccc1)(c1ccccc1)CC.P(c1ccccc1)(c1ccccc1)CC
87	W	[HW(CO)3(PPhMe2)3]+	0	DCE	Estimated using enthalpy of protonation (ref of enthalpy: CF3SO3H)	https://doi.org/10.1021/acs.chemrev.5b00695	https://doi.org/10.1021/ja410718r	https://doi.org/10.1021/ja9441930	8595 ; 1954 ; 937	298		87	[W]([C][O])([C][O])([C][O])(P(c1ccccc1)(c1ccccc1)C)(P(c1ccccc1)(c1ccccc1)C)P(c1ccccc1)(c1ccccc1)C	[W].[C]=O.[C]=O.[CH]=O.P(c1ccccc1)(c1ccccc1)C.P(c1ccccc1)(c1ccccc1)C.P(c1ccccc1)(c1ccccc1)C
88	Cr	[HCr(CO)2(dppm)2]+	4.5	DCE	Estimated using enthalpy of protonation (ref of enthalpy: CF3SO3H)	https://doi.org/10.1021/acs.chemrev.5b00695	https://doi.org/10.1021/ja410718r	https://doi.org/10.1021/ja9441930	8595 ; 1954 ; 937	298		88	[Cr]1(P(CP1(c1ccccc1)c1ccccc1)(c1ccccc1)c1ccccc1)([C][O])[C][O]	[CrH]1(P(CP1(c1ccccc1)c1ccccc1)(c1ccccc1)c1ccccc1)([C][O])[C][O]
89	Mo	[HMo(CO)2(dppm)2]+	6.8	CH2Cl2	Estimated using enthalpy of protonation (ref of enthalpy: CF3SO3H)	https://doi.org/10.1021/acs.chemrev.5b00695	https://doi.org/10.1021/ja410718r	https://doi.org/10.1021/ic00034a015	8595 ; 1954 ; 53	298		89	P1(CP(c2ccccc2)(c2ccccc2)[Mo]1([C][O])[C][O])(c1ccccc1)c1ccccc1	P1(CP(c2ccccc2)(c2ccccc2)[Mo]1([C][O])C=O)(c1ccccc1)c1ccccc1
90	W	[HW(CO)2(dppm)2]+	7.8	DCE	Estimated using enthalpy of protonation (ref of enthalpy: CF3SO3H)	https://doi.org/10.1021/acs.chemrev.5b00695	https://doi.org/10.1021/ja410718r	https://doi.org/10.1021/ja9441930	8595 ; 1954 ; 937	298		90	P1(CP(c2ccccc2)(c2ccccc2)[W]1([C][O])[C][O])(c1ccccc1)c1ccccc1	P1(CP(c2ccccc2)(c2ccccc2)[WH]1([C][O])[C][O])(c1ccccc1)c1ccccc1
91	W	[HW(CO)3(PEt3)3]+	4.2	DCE	Estimated using enthalpy of protonation (ref of enthalpy: CF3SO3H)	https://doi.org/10.1021/acs.chemrev.5b00695	https://doi.org/10.1021/ja410718r	https://doi.org/10.1021/ja9441930	8595 ; 1954 ; 937	298		91	[W]([C][O])([C][O])([C][O])(P(CC)(CC)CC)(P(CC)(CC)CC)P(CC)(CC)CC	[W].[CH]=O.[C]=O.[C]=O.P(CC)(CC)CC.P(CC)(CC)CC.P(CC)(CC)CC
92	W	[HW(CO)3(PMe3)3]+	1.1	DCE	Estimated using enthalpy of protonation (ref of enthalpy: CF3SO3H)	https://doi.org/10.1021/acs.chemrev.5b00695	https://doi.org/10.1021/ja410718r	https://doi.org/10.1021/ja9441930	8595 ; 1954 ; 937	298		92	[W]([C][O])([C][O])([C][O])(P(C)(C)C)(P(C)(C)C)P(C)(C)C	[WH]12(C([O])(C1=O)C2=O)(P(C)(C)C)P(C)(C)C.P(C)(C)C
93	W	[HW(CO)2(dppe)2]+	4.2	DCE	Estimated using enthalpy of protonation (ref of enthalpy: CF3SO3H)	https://doi.org/10.1021/acs.chemrev.5b00695	https://doi.org/10.1021/ja410718r	https://doi.org/10.1021/ja9441930	8595 ; 1954 ; 937	298		93	[W]1([C][O])([C][O])P(CCP1(c1ccccc1)c1ccccc1)(c1ccccc1)c1ccccc1	[WH]([C][O])([C][O])P(CCP(c1ccccc1)c1ccccc1)(c1ccccc1)c1ccccc1
94	Mo	[HMo(CO)2(dppe)2]+	5.5	CH2Cl2	Estimated using enthalpy of protonation (ref of enthalpy: CF3SO3H)	https://doi.org/10.1021/acs.chemrev.5b00695	https://doi.org/10.1021/ja410718r	https://doi.org/10.1021/ic00034a015	8595 ; 1954 ; 53	298		94	[C]([O])[Mo]1([C][O])P(CCP1(c1ccccc1)c1ccccc1)(c1ccccc1)c1ccccc1	[C]([O])[MoH]1([C][O])P(CCP1(c1ccccc1)c1ccccc1)(c1ccccc1)c1ccccc1
95	Mo	[HMo(CO)2(dppp)2]+	0.8	CH2Cl2	Estimated using enthalpy of protonation (ref of enthalpy: CF3SO3H)	https://doi.org/10.1021/acs.chemrev.5b00695	https://doi.org/10.1021/ja410718r	https://doi.org/10.1021/ic00034a015	8595 ; 1954 ; 53	298		95	[Mo]([C][O])[C][O].P(CCCP(c1ccccc1)c1ccccc1)(c1ccccc1)c1ccccc1	[MoH]([C][O])[C][O].P(CCCP(c1ccccc1)c1ccccc1)(c1ccccc1)c1ccccc1
96	Mo	[HMo(CO)2(dmpe)2]+	12	CH2Cl2	Estimated using enthalpy of protonation (ref of enthalpy: CF3SO3H)	https://doi.org/10.1021/acs.chemrev.5b00695	https://doi.org/10.1021/ja410718r	https://doi.org/10.1021/ic00034a015	8595 ; 1954 ; 53	298		96	[Mo]1(P(CCP1(C)C)(C)C)([C][O])[C][O]	[MoH]12(P(CCP1(C)C)(C)C)C(=O)C2=O
97	Cr	[HCr(N2)((P(Ph))3(N(Bn))3)(dmpe)]+	22.5	THF	Warning DFT calculated' [H(OEt2)2][B(C6F5)4]	https://doi.org/10.1021/acs.chemrev.5b00695	https://doi.org/10.1021/acs.inorgchem.5b00351		8596 ; 4831	298		97	[Cr]123([N][N])([P@@]4(CN(C[P@]1(CN(C[P@]2(CN(C4)Cc1ccccc1)c1ccccc1)Cc1ccccc1)c1ccccc1)Cc1ccccc1)c1ccccc1)P(CCP3(C)C)(C)C	[CrH]12([N][N])([P@@]3(CN(C[P@]1(CN(C[P@]2(CN(C3)Cc1ccccc1)c1ccccc1)Cc1ccccc1)c1ccccc1)Cc1ccccc1)c1ccccc1)P(CCP(C)C)(C)C
98	Mo	HCpMo(CO)3	17	THF	OsH2(PMePh2)4	https://doi.org/10.1021/acs.chemrev.5b00695	https://doi.org/10.1021/ja994428d		8596 ; 9165	298		98	[C@@H]12C=C[C@@H]([CH]1)[Mo]2([C][O])([C][O])[C][O]	[C@@H]12C=C[C@@H]([CH]1)[MoH]132C(=O)[C@]3(C1=O)[O]
99	W	H(C5H4COO-)W(CO)3	5.8	H2O	H2O	https://doi.org/10.1021/acs.chemrev.5b00695	https://doi.org/10.1021/om0102089	https://doi.org/10.1021/om990778x	8596 ; 3731	298		99	[W]1([C][O])([C][O])([C][O])[C@H]2[C]([C@@H]1C=C2)C(=O)[O]	[WH]1([C][O])([C][O])C(=O)OC(=O)[C@@]21C=CC=C2
100	Cr	HCp*Cr(CO)3	17	acetonitrile	benzylamine	https://doi.org/10.1021/acs.chemrev.5b00695	https://doi.org/10.1021/ja710455c		8596 ; 4252	298		100	[C]([O])[Cr]1([C][O])([C][O])[C@@]2([C]([C@]1(C(=C2C)C)C)C)C	C1(=O)[C@@]2(C(=O)[CrH]12[C@@]1(C(=C(C(=C1C)C)C)C)C)[O]
101	Cr	HCpCr(CO)2(PCy)3	26.1	acetonitrile	tBuP1(dma)	https://doi.org/10.1021/acs.chemrev.5b00695	https://doi.org/10.1021/ic302460y		8596 ; 1596	298		101	[Cr]1([C@H]2[CH]C=C[CH]2)C(=O)C1=O.P(C1CCCCC1)(C1CCCCC1)C1CCCCC1	[CrH]1([C@H]2C=CC=C2)C(=O)C1=O.P(C1CCCCC1)(C1CCCCC1)C1CCCCC1
102	Cr	HCpCr(CO)2(IMe)	27.2	acetonitrile	[HtBuP1(pyrr)]BF4	https://doi.org/10.1021/acs.chemrev.5b00695	https://doi.org/10.1021/ic302460y		8596 ; 1596	298		102	[Cr]1([C@@H]2[CH]C=C[CH]2)(C(=O)C1=O)[C@H]1N(C=CN1C)C	[CrH]1([C@H]2C=CC=C2)(C(=O)C1=O)[C@@H]1N(C=CN1C)C
103	W	HCpW(CO)2(IMes)	31.9	acetonitrile	Verkade's base	https://doi.org/10.1021/acs.chemrev.5b00695	https://doi.org/10.1021/ja202830w		8596 ; 14605	298		103	[Cr]1([C@H]2[CH]C=C[CH]2)(C(=O)C1=O)[C@@H]1N(C=CN1c1c(cc(cc1C)C)C)c1c(cc(cc1C)C)C	[CrH]1([C@H]2C=CC=C2)(C(=O)C1=O)[C@@H]1N(C=CN1c1c(cc(cc1C)C)C)c1c(cc(cc1C)C)C
104	W	H6W(PPhMe2)3	42	THF	Z[ReH6(PCy3)2]	https://doi.org/10.1021/acs.chemrev.5b00695	https://doi.org/10.1021/ic062037b		8596 ; 4397	298		104	[WH5]P(c1ccccc1)(C)C.P(c1ccccc1)(C)C.P(c1ccccc1)(C)C	[WH4](P(c1ccccc1)(C)C)P(c1ccccc1)(C)C.P(c1ccccc1)(C)C.[H].[H]
105	Re	[(H2)Cp*Re(NO)(CO)]+	-2	CH2Cl2	diethylether	https://doi.org/10.1021/acs.chemrev.5b00695	https://pubs.acs.org/doi/pdf/10.1021/om00109a042		8598 ; 1825	T = 190 K		105	[ReH]1([C][O])([N][O])[C@]2([C]([C@@]1(C(=C2C)C)C)C)C	[ReH]([C][O])[N][O].C1(=C([C@H](C(=C1C)C)C)C)C.[H]
106	Re	[HCp*Re(CO)2(PMe2Ph)]+	0.5	DCE	Estimated using enthalpy of protonation (ref of enthalpy: CF3SO3H)	https://doi.org/10.1021/acs.chemrev.5b00695	https://doi.org/10.1021/ja410718r	https://doi.org/10.1021/ja9441930	8598 ; 1952 ; 937	298		106	[Re]([C@]1(C(=C(C(=C1C)C)C)C)C)([C][O])[C][O].P(C)(C)c1ccccc1	[ReH]1([C@@]2([C]([C@]1(C(=C2C)C)C)C)C)([C][O])[C][O].P(C)(C)c1ccccc1
107	Re	[HCp*Re(CO)2(PMe3)]+	1.5	DCE	Estimated using enthalpy of protonation (ref of enthalpy: CF3SO3H)	https://doi.org/10.1021/acs.chemrev.5b00695	https://doi.org/10.1021/ja410718r	https://doi.org/10.1021/ja9441930	8598 ; 1952 ; 937	298		107	[Re]1([C@@]2([C]([C@]1(C(=C2C)C)C)C)C)([C][O])[C][O].P(C)(C)C	[ReH]([C@]1(C(=C(C(=C1C)C)C)C)C)([C][O])[C][O].P(C)(C)C
108	Re	[(H2)Re(CO)2(MeC(CH2PPh2)3)]+	11	CH2Cl2	(CF3)3COH	https://doi.org/10.1021/acs.chemrev.5b00695	https://doi.org/10.1016/S0020-1693(98)00063-2		8599 ; 304	T < 260 K	pKa DMSO but reaction done in lower dielectric constant solvent	108	[Re]12([C][O])([C][O])P(C[C@](CP1(c1ccccc1)c1ccccc1)(CP2(c1ccccc1)c1ccccc1)C)(c1ccccc1)c1ccccc1.[H]	[Re]12([C][O])([C][O])P(C[C@](CP1(c1ccccc1)c1ccccc1)(CP2(c1ccccc1)c1ccccc1)C)(c1ccccc1)c1ccccc1.[H].[H]				Here I used CH2Cl2 in xtb
109	Re	[H2Cp2Re]+	8.5	H2O/dioxane	H2O	https://doi.org/10.1021/acs.chemrev.5b00695	https://pubs.rsc.org/--/content/articlepdf/1958/jr/jr9580003916		8598 ; 3918	298	H2O used as solvent	109	[ReH]([C@H]1[CH]C=C[CH]1)[C@@H]1[CH]C=C[CH]1	[ReH2]([C@H]1C=CC=C1)[C@@H]1C=CC=C1
110	Re	H2Re2(CO)9	18	CD2Cl2	(CF3)2CHOH	https://doi.org/10.1021/acs.chemrev.5b00695	https://doi.org/10.1002/chem.200500920		8599 ; 1017	T < 240 K	pKa DMSO but reaction done in lower dielectric constant solvent	110	[Re]([Re]([C][O])(C=O)([C][O])[C][O])([C][O])([C][O])([C][O])([C][O])[C][O]	[Re]([Re]([C][O])(C=O)(C=O)[C][O])([C][O])([C][O])([C][O])([C][O])[C][O]				Here I used CH2Cl2 in xtb
111	Mn	HMn(CO)5	7.1	H2O	H2O	https://doi.org/10.1021/acs.chemrev.5b00695	https://pubs.acs.org/doi/pdf/10.1021/cr00065a002		8598 ; 45	298		111	[Mn]([C][O])([C][O])([C][O])([C][O])[C][O]	[MnH]([C][O])([C][O])([C][O])([C][O])[C][O]
112	Re	[H4Re(PMePh2)4]+	15.8	THF	[OsH3(PMe2Ph)4]BPh4	https://doi.org/10.1021/acs.chemrev.5b00695	https://doi.org/10.1021/ja994428d		8598 ; 9161	298		112	[ReH3](P(C)(c1ccccc1)c1ccccc1)(P(C)(c1ccccc1)c1ccccc1)P(C)(c1ccccc1)c1ccccc1.P(C)(c1ccccc1)c1ccccc1	[ReH4](P(C)(c1ccccc1)c1ccccc1)P(C)(c1ccccc1)c1ccccc1.P(C)(c1ccccc1)c1ccccc1.P(C)(c1ccccc1)c1ccccc1
113	Re	[H4Re(PMe2Ph)4]+	20	THF	[OsH3(PEt3)4]BPh4	https://doi.org/10.1021/acs.chemrev.5b00695	https://doi.org/10.1021/ja994428d		8598 ; 9161	298		113	[ReH](P(C)(C)c1ccccc1)(P(C)(C)c1ccccc1)(P(C)(C)c1ccccc1)P(C)(C)c1ccccc1	[ReH4](P(C)(C)c1ccccc1)P(C)(C)c1ccccc1.P(C)(C)c1ccccc1.P(C)(C)c1ccccc1
114	Re	[H4Re(PMe2Ph)4]+	20	THF	CH2(CN)2	https://doi.org/10.1021/acs.chemrev.5b00695	https://doi.org/10.1021/ja994428d		8598 ; 9161	298		114	[ReH](P(C)(C)c1ccccc1)(P(C)(C)c1ccccc1)(P(C)(C)c1ccccc1)P(C)(C)c1ccccc1	[ReH4](P(C)(C)c1ccccc1)P(C)(C)c1ccccc1.P(C)(C)c1ccccc1.P(C)(C)c1ccccc1
115	Re	[H4Re(PMe2Ph)4]+	25.5	acetonitrile	DBU	https://doi.org/10.1021/acs.chemrev.5b00695	https://pubs.acs.org/doi/pdf/10.1021/ic00023a037		8598 ; 4471	298		115	[ReH3](P(C)(C)c1ccccc1)(P(C)(C)c1ccccc1)P(C)(C)c1ccccc1.P(C)(C)c1ccccc1	[ReH4](P(C)(C)c1ccccc1)P(C)(C)c1ccccc1.P(C)(C)c1ccccc1.P(C)(C)c1ccccc1
116	Re	[H4Re(PMe3)4]+	22.9	THF	[ReH4(PMe2Ph)4]BPh4	https://doi.org/10.1021/acs.chemrev.5b00695	https://doi.org/10.1021/ja994428d		8598 ; 9161	298		116	[ReH](P(C)(C)C)(P(C)(C)C)P(C)(C)C.P(C)(C)C	[ReH4](P(C)(C)C)P(C)(C)C.P(C)(C)C.P(C)(C)C
117	Re	[H2Re(PMe3)5]+	24.2	THF	ReH3(PMe3)4	https://doi.org/10.1021/acs.chemrev.5b00695	https://doi.org/10.1021/ja994428d		8598 ; 9161	298		117	[ReH](P(C)(C)C)(P(C)(C)C)(P(C)(C)C)(P(C)(C)C)P(C)(C)C	[ReH2](P(C)(C)C)(P(C)(C)C)(P(C)(C)C)P(P(C)(C)C)(C)(C)C
118	Re	H7Re(Ph2PC6H4F)2	28	THF	ReH(PMe3)5	https://doi.org/10.1021/acs.chemrev.5b00695	https://doi.org/10.1021/ja994428d		8598 ; 9161	298		118	[Re](Pc1ccccc1)(P(c1ccccc1)c1ccccc1)(c1ccccc1)(c1ccc(cc1)F)c1ccc(cc1)F.[H].[H]	[Re@@](P(c1ccccc1)c1ccccc1)([P@H](c1ccccc1)c1ccc(cc1)F)(c1ccc(cc1)F)c1ccccc1.[H].[H].[H].[H]
119	Re	H7Re(PPh3)2	30	THF	FeH(Cp)(CO)2	https://doi.org/10.1021/acs.chemrev.5b00695	https://doi.org/10.1021/ja994428d		8598 ; 9161	298		119	[ReH3].P(c1ccccc1)(c1ccccc1)c1ccccc1.P(c1ccccc1)(c1ccccc1)c1ccccc1.[H]	[ReH2](P(c1ccccc1)c1ccccc1)(P(c1ccccc1)(c1ccccc1)c1ccccc1)c1ccccc1.[H].[H].[H].[H]
120	Re	H4Re(NO)(PiPr3)2	38	THF	OsH4(CO)(PiPr3)2	https://doi.org/10.1021/acs.chemrev.5b00695	https://doi.org/10.1021/ja994428d		8598 ; 9161	298		120	[ReH2](P(C(C)C)(C(C)C)C(C)C)(P(C(C)C)(C(C)C)C(C)C)[N][O].[H]	[ReH4](P(C(C)C)(C(C)C)C(C)C)[N][O].P(C(C)C)(C(C)C)C(C)C
121	Re	H5Re(PMePh2)3	40	THF	Z[NPh2]	https://doi.org/10.1021/acs.chemrev.5b00695	https://doi.org/10.1021/ja994428d		8598 ; 9161	298		121	[ReH4](P(C)(c1ccccc1)c1ccccc1)P(C)(c1ccccc1)c1ccccc1.P(C)(c1ccccc1)c1ccccc1	[ReH5]P(C)(c1ccccc1)c1ccccc1.P(C)(c1ccccc1)c1ccccc1.P(C)(c1ccccc1)c1ccccc1
122	Re	H7Re(PCy3)2	41	THF	Z[NPh2]	https://doi.org/10.1021/acs.chemrev.5b00695	https://doi.org/10.1021/ja994428d		8598 ; 9161	298		122	[ReH6].P(C1CCCCC1)(C1CCCCC1)C1CCCCC1.P(C1CCCCC1)(C1CCCCC1)C1CCCCC1	[ReH6].P(C1CCCCC1)(C1CCCCC1)C1CCCCC1.P(C1CCCCC1)(C1CCCCC1)C1CCCCC1.[H]
123	Re	H8Re2(PMePh2)4	33 � 4	THF	Z[PO(OEt)2NPh]	https://doi.org/10.1021/acs.chemrev.5b00695	https://doi.org/10.1021/ic010041b		8598 ; 2418	298		123	[ReH]([Re@@H](P(C)(c1ccccc1)c1ccccc1)P(C)(c1ccccc1)c1ccccc1)([P@H](C)c1ccccc1)(P(C)(c1ccccc1)c1ccccc1)c1ccccc1.[H].[H]	[Re]#[Re].P(C)(c1ccccc1)c1ccccc1.P(C)(c1ccccc1)c1ccccc1.P(C)(c1ccccc1)c1ccccc1.P(C)(c1ccccc1)c1ccccc1.[H].[H].[H].[H]
124	Fe	[(H2)Fe(CO)(dppe)2]+2	<-5	CH2Cl2	CF3SO3H	https://doi.org/10.1021/acs.chemrev.5b00695	https://doi.org/10.1021/ic990876a	https://doi.org/10.1039/A700885F	8605 ; 6063	298		124	[FeH]12([C][O])(P(CCP1(c1ccccc1)c1ccccc1)(c1ccccc1)c1ccccc1)P(CCP2(c1ccccc1)c1ccccc1)(c1ccccc1)c1ccccc1	[FeH2]1([C][O])(P(CCP1(c1ccccc1)c1ccccc1)(c1ccccc1)c1ccccc1)P(CCP(c1ccccc1)c1ccccc1)(c1ccccc1)c1ccccc1
125	Os	[(H2)Os(CO)(dppp)2]+2	-5.7	CD2Cl2	CF3SO3H	https://doi.org/10.1021/acs.chemrev.5b00695	https://pubs.acs.org/doi/abs/10.1021/ic9605579		8605 ; 714	298	Regarded as rough estimations due to instability at room temperature	125	[OsH]12(P(CCCP1(c1ccccc1)c1ccccc1)(c1ccccc1)c1ccccc1)(P(CCCP2(c1ccccc1)c1ccccc1)(c1ccccc1)c1ccccc1)[C][O]	[OsH].P(CCCP(c1ccccc1)c1ccccc1)(c1ccccc1)c1ccccc1.P(CCCP(c1ccccc1)c1ccccc1)(c1ccccc1)c1ccccc1.[C]=O.[H]
126	Ru	[(H2)Ru(CO)(dppp)2]+2	-6	CD2Cl2	CF3SO3H	https://doi.org/10.1021/acs.chemrev.5b00695	https://pubs.acs.org/doi/abs/10.1021/ic9605579		8605 ; 714	298	Regarded as rough estimations due to instability at room temperature	126	P1(CCCP(c2ccccc2)(c2ccccc2)[RuH]21(P(CCCP2(c1ccccc1)c1ccccc1)(c1ccccc1)c1ccccc1)[C][O])(c1ccccc1)c1ccccc1	P(CCCP(c1ccccc1)c1ccccc1)(c1ccccc1)c1ccccc1.P(CCCP(c1ccccc1)c1ccccc1)(c1ccccc1)c1ccccc1.[C]=O.[RuH].[H]
127	Os	[(H2)Os(Cl)(dppp)2]+	12.5	CH2Cl2	triethylamine	https://doi.org/10.1021/acs.chemrev.5b00695	https://pubs.acs.org/doi/abs/10.1021/ic9605579		8605 ; 714	298		127	P1(CCCP(c2ccccc2)(c2ccccc2)[OsH]21(P(CCCP2(c1ccccc1)c1ccccc1)(c1ccccc1)c1ccccc1)Cl)(c1ccccc1)c1ccccc1	P1(CCCP(c2ccccc2)(c2ccccc2)[OsH2]1(P(CCCP(c1ccccc1)c1ccccc1)(c1ccccc1)c1ccccc1)Cl)(c1ccccc1)c1ccccc1
128	Ru	[(H2)Ru(Cl)(dppp)2]+	4.4	CH2Cl2	PPh3	https://doi.org/10.1021/acs.chemrev.5b00695	https://pubs.acs.org/doi/abs/10.1021/ic9605579		8605 ; 714	298		128	P1(CCCP(c2ccccc2)(c2ccccc2)[RuH]21(P(CCCP2(c1ccccc1)c1ccccc1)(c1ccccc1)c1ccccc1)Cl)(c1ccccc1)c1ccccc1	P1(CCCP(c2ccccc2)(c2ccccc2)[RuH2]1(P(CCCP(c1ccccc1)c1ccccc1)(c1ccccc1)c1ccccc1)Cl)(c1ccccc1)c1ccccc1
129	Ru	[(H2)Ru(CNH)(dppe)2]+2	-5	CH2Cl2	CF3SO3H	https://doi.org/10.1021/acs.chemrev.5b00695	https://doi.org/10.1039/A906717E		8605 ; 4480	298		129	[RuH]12(P(CCP1(c1ccccc1)c1ccccc1)(c1ccccc1)c1ccccc1)(P(CCP2(c1ccccc1)c1ccccc1)(c1ccccc1)c1ccccc1)[C][NH]	[RuH].P(CCP(c1ccccc1)c1ccccc1)(c1ccccc1)c1ccccc1.P(CCP(c1ccccc1)c1ccccc1)(c1ccccc1)c1ccccc1.[C][NH].[H]
130	Ru	[(H2)Ru(CO)(PPh3)(tacn)]+2	-1.3	CH2Cl2	Et2O	https://doi.org/10.1021/acs.chemrev.5b00695	https://doi.org/10.1002/chem.200601484	https://doi.org/10.1021/om9710374	8605 ; 3802 ; 2056	T = 193 K		130	[RuH]1([N@H]2CC[N@@H]1CCNCC2)([C][O])P(c1ccccc1)(c1ccccc1)c1ccccc1	[RuH].N1CCNCCNCC1.[C]=O.P(c1ccccc1)(c1ccccc1)c1ccccc1.[H]
131	Os	[(H2)Os(CO)(PMePh2)2(bpy)]+2	-5	CD2Cl2	CF3SO3H	https://doi.org/10.1021/acs.chemrev.5b00695	https://doi.org/10.1021/ic970975t		8605 ; 130	298		131	[OsH]1(N2C=CCC=C2C2=CCC=CN12)(P(C)(c1ccccc1)c1ccccc1)(P(C)(c1ccccc1)c1ccccc1)[C][O]	[OsH].n1ccccc1c1ncccc1.P(C)(c1ccccc1)c1ccccc1.P(C)(c1ccccc1)c1ccccc1.[C]=O.[H]
132	Os	[(H2)Os(CO)(PPh3)2(bpy)]+2	-5	CD2Cl2	CF3SO3H	https://doi.org/10.1021/acs.chemrev.5b00695	https://doi.org/10.1021/ic970975t		8605 ; 130	298		132	[OsH]1(N2C=CCC=C2C2=CCC=CN12)(P(c1ccccc1)(c1ccccc1)c1ccccc1)(P(c1ccccc1)(c1ccccc1)c1ccccc1)[C][O]	[OsH].n1ccccc1c1ncccc1.P(c1ccccc1)(c1ccccc1)c1ccccc1.P(c1ccccc1)(c1ccccc1)c1ccccc1.[C]=O.[H]
133	Os	[(H2)Os(CO)(PPh3)2(phen)]+2	-5	CD2Cl2	CF3SO3H	https://doi.org/10.1021/acs.chemrev.5b00695	https://doi.org/10.1021/ic970975t		8605 ; 130	298		133	[OsH]1(P(c2ccccc2)(c2ccccc2)c2ccccc2)(P(c2ccccc2)(c2ccccc2)c2ccccc2)([C][O])n2c3c4c(ccc3ccc2)cccn14	[OsH].P(c1ccccc1)(c1ccccc1)c1ccccc1.P(c1ccccc1)(c1ccccc1)c1ccccc1.[C]=O.c12c3c(cccn3)ccc1cccn2.[H]
134	Ru	[(H2)Ru(CO)(PPh3)2(bpy)]+2	-5	CD2Cl2	CF3SO3H	https://doi.org/10.1021/acs.chemrev.5b00695	https://doi.org/10.1021/ic970975t		8605 ; 130	298		134	N12C=CCC=C1C1=CCC=CN1[RuH]2(P(c1ccccc1)(c1ccccc1)c1ccccc1)(P(c1ccccc1)(c1ccccc1)c1ccccc1)[C][O]	N12C=CCC=C1C1=CCC=CN1[RuH2]2(P(c1ccccc1)(c1ccccc1)c1ccccc1)[C][O].P(c1ccccc1)(c1ccccc1)c1ccccc1
135	Ru	[(H2)Ru(CO)(PPh3)(HBPz3)]+	-0.6	CH2Cl2	[RuH(CO)(PPh3)(tacn)]+	https://doi.org/10.1021/acs.chemrev.5b00695	https://doi.org/10.1002/chem.200601484	https://doi.org/10.1021/om9710374	8605 ; 3802 ; 2056	T = 193 K	HBPz3 = hydrotris-(pyrazolyl)borato	135	[RuH]12(N3C=CCN3[B@@H](N3N1C=CC3)N1N2C=CC1)([C][O])P(c1ccccc1)(c1ccccc1)c1ccccc1	[RuH2]12(N3C=CCN3[B@@H](N3N1C=CC3)N1N2C=CC1)[C][O].P(c1ccccc1)(c1ccccc1)c1ccccc1
136	Fe	[HFe(CO)3(Ptol3)2]+	-1.2 ; 0.74 ; 1.2	CD2Cl2	[Fe(CO)3(PCyPh2)2] ; [Fe(CO)3{PPh2(tol)2}] ; [Fe(CO)3(PPh3)2]	https://doi.org/10.1021/acs.chemrev.5b00695	https://doi.org/10.1002/chem.200601484		8605 ; 3798	298		136	[C]([O])[Fe]([C][O])([C][O])(P(c1ccc(cc1)C)(c1ccc(cc1)C)c1ccc(cc1)C)P(c1ccc(cc1)C)(c1ccc(cc1)C)c1ccc(cc1)C	[C]([O])[FeH]([C][O])([C][O])(P(c1ccc(cc1)C)(c1ccc(cc1)C)c1ccc(cc1)C)P(c1ccc(cc1)C)(c1ccc(cc1)C)c1ccc(cc1)C
137	Fe	[HFe(CO)3(PPh3)2]+	0.43 ; 2.3	CD2Cl2	[Fe(CO)3{PPh2(tol)2}] ; [Fe(CO)3{P(p-FC6H5)3}2	https://doi.org/10.1021/acs.chemrev.5b00695	https://doi.org/10.1002/chem.200601484		8605 ; 3798	298		137	[C]([O])[Fe]([C][O])([C][O])(P(c1ccccc1)(c1ccccc1)c1ccccc1)P(c1ccccc1)(c1ccccc1)c1ccccc1	[C]([O])[FeH]([C][O])([C][O])(P(c1ccccc1)(c1ccccc1)c1ccccc1)P(c1ccccc1)(c1ccccc1)c1ccccc1
138	Fe	[HFe(CO)3(PPh3)2]+	-0.6	DCE	Estimated using enthalpy of protonation (ref of enthalpy: CF3SO3H)	https://doi.org/10.1021/acs.chemrev.5b00695	https://doi.org/10.1021/ja410718r	https://doi.org/10.1021/ja9441930	8598 ; 1951 ; 937	298		138	[C]([O])[Fe]([C][O])([C][O])(P(c1ccccc1)(c1ccccc1)c1ccccc1)P(c1ccccc1)(c1ccccc1)c1ccccc1	[C]([O])[FeH]([C][O])([C][O])(P(c1ccccc1)(c1ccccc1)c1ccccc1)P(c1ccccc1)(c1ccccc1)c1ccccc1
139	Fe	[HFe(CO)3(PPh2Cy)2]+	1.2 ; 1.5	CD2Cl2	[Fe(CO)3(PCy3)2] ; PPh3	https://doi.org/10.1021/acs.chemrev.5b00695	https://doi.org/10.1002/chem.200601484		8598 ; 3798	298		139	[C]([O])[Fe]([C][O])([C][O])(P(c1ccccc1)(c1ccccc1)C1CCCCC1)P(c1ccccc1)(c1ccccc1)C1CCCCC1	[C]([O])[FeH]([C][O])([C][O])(P(c1ccccc1)(c1ccccc1)C1CCCCC1)P(c1ccccc1)(c1ccccc1)C1CCCCC1
140	Fe	[HFe(CO)3(dppp)]+	2	DCE	Estimated using enthalpy of protonation (ref of enthalpy: CF3SO3H)	https://doi.org/10.1021/acs.chemrev.5b00695	https://doi.org/10.1021/ja410718r	https://doi.org/10.1021/ja9441930	8598 ; 1951 ; 937	298		140	[Fe]1(P(CCCP1(c1ccccc1)c1ccccc1)(c1ccccc1)c1ccccc1)([C][O])([C][O])[C][O]	[FeH]1(P(CCCP1(c1ccccc1)c1ccccc1)(c1ccccc1)c1ccccc1)([C][O])([C][O])[C][O]
141	Fe	[HFe(CO)3(dppm)]+	3.6	DCE	Estimated using enthalpy of protonation (ref of enthalpy: CF3SO3H)	https://doi.org/10.1021/acs.chemrev.5b00695	https://doi.org/10.1021/ja410718r	https://doi.org/10.1021/ja9441930	8598 ; 1951 ; 937	298		141	[Fe]1(P(CP1(c1ccccc1)c1ccccc1)(c1ccccc1)c1ccccc1)([C][O])([C][O])[C][O]	[FeH]1(P(CP1(c1ccccc1)c1ccccc1)(c1ccccc1)c1ccccc1)([C][O])([C][O])[C][O]
142	Fe	[HFe(CO)3(dppe)]+	3.2	DCE	Estimated using enthalpy of protonation (ref of enthalpy: CF3SO3H)	https://doi.org/10.1021/acs.chemrev.5b00695	https://doi.org/10.1021/ja410718r	https://doi.org/10.1021/ar00050a001	8605 ; 1951 ; 53	298		142	[Fe]1(P(CCP1(c1ccccc1)c1ccccc1)(c1ccccc1)c1ccccc1)([C][O])([C][O])[C][O]	[FeH]1(P(CCP1(c1ccccc1)c1ccccc1)(c1ccccc1)c1ccccc1)([C][O])([C][O])[C][O]
143	Fe	[HFe(CO)3(PPh2Me)2]+	0.1	DCE	Estimated using enthalpy of protonation (ref of enthalpy: CF3SO3H)	https://doi.org/10.1021/acs.chemrev.5b00695	https://doi.org/10.1021/ja410718r	https://doi.org/10.1021/ja9441930	8605 ; 1951 ; 937	298		143	[Fe](P(c1ccccc1)(c1ccccc1)C)(P(c1ccccc1)(c1ccccc1)C)([C][O])([C][O])[C][O]	[FeH](P(c1ccccc1)(c1ccccc1)C)(P(c1ccccc1)(c1ccccc1)C)([C][O])([C][O])[C][O]
144	Fe	[HFe(CO)3(PPhMe2)2]+	2.1	DCE	Estimated using enthalpy of protonation (ref of enthalpy: CF3SO3H)	https://doi.org/10.1021/acs.chemrev.5b00695	https://doi.org/10.1021/ja410718r	https://doi.org/10.1021/ja9441930	8605 ; 1951 ; 937	298		144	[Fe](P(c1ccccc1)(C)C)(P(c1ccccc1)(C)C)([C][O])([C][O])[C][O]	[FeH](P(c1ccccc1)(C)C)(P(c1ccccc1)(C)C)([C][O])([C][O])[C][O]
145	Ru	[(H2)Ru(PPh3)(tacn)]+2	4.5	CH2Cl2	RuHCl(dppe)2	https://doi.org/10.1021/acs.chemrev.5b00695	https://doi.org/10.1002/chem.200601484	https://doi.org/10.1021/om9710374	8605 ; 3802 ; 2056	298		145	[RuH]1([N@H]2CC[N@@H]1CCNCC2)(P(c1ccccc1)(c1ccccc1)c1ccccc1)P(c1ccccc1)(c1ccccc1)c1ccccc1	[RuH].N1CCNCCNCC1.P(c1ccccc1)(c1ccccc1)c1ccccc1.P(c1ccccc1)(c1ccccc1)c1ccccc1.[H]
146	Ru	[(H2)CpRu(CO)(PCy3)]+	11	CH2Cl2	(CF3)3COH	https://doi.org/10.1021/acs.chemrev.5b00695	https://doi.org/10.1002/1099-0682(200107)2001:7<1753::AID-EJIC1753>3.0.CO;2-H		8605 ; 1759	T = 200 K	pKa DMSO but reaction done in lower dielectric constant solvent	146	[RuH]([C@H]1C=CC=C1)[C][O].P(C1CCCCC1)(C1CCCCC1)C1CCCCC1	[RuH2]1([C@@H]2C=C[C@H]1[CH]2)[C][O].P(C1CCCCC1)(C1CCCCC1)C1CCCCC1				Here I used CH2Cl2 in xtb
147	Fe	[(H2)Fe(CNH)(depe)2]+2	2.7	CH2Cl2	PPh3	https://doi.org/10.1021/acs.chemrev.5b00695	https://doi.org/10.1021/ja410718r	https://doi.org/10.1039/A906717E	8605 ; 1955 ; 4481	298		147	[FeH]12([C][NH])(P(CCP1(CC)CC)(CC)CC)P(CCP2(CC)CC)(CC)CC	[FeH].[C][NH].P(CCP(CC)CC)(CC)CC.P(CCP(CC)CC)(CC)CC.[H]
148	Os	[(H2)2Os(NHC-C6H4)(PiPr3)2]+	3.5	acetone	acetone	https://doi.org/10.1021/acs.chemrev.5b00695	https://doi.org/10.1021/om501275c		8605 ; 782	298		148	[OsH3]1(P(C(C)C)(C(C)C)C(C)C)c2ccccc2N2[C@@H]1N(C)c1c2cccc1.P(C(C)C)(C(C)C)C(C)C	[OsH4]1c2ccccc2N2[C@H]1N(C)c1c2cccc1.P(C(C)C)(C(C)C)C(C)C.P(C(C)C)(C(C)C)C(C)C
149	Os	[(H2)Os(CH3CN)(dppe)2]+2	-2	CH2Cl2	diethylether	https://doi.org/10.1021/acs.chemrev.5b00695	https://doi.org/10.1002/chem.200601484		8605 ; 3802	298		149	[OsH]12(P(CCP1(c1ccccc1)c1ccccc1)(c1ccccc1)c1ccccc1)(P(CCP2(c1ccccc1)c1ccccc1)(c1ccccc1)c1ccccc1)[N][C]C	[OsH2]1(P(CCP(c2ccccc2)c2ccccc2)(c2ccccc2)c2ccccc2)(P(CCP1(c1ccccc1)c1ccccc1)(c1ccccc1)c1ccccc1)[N][C]C
150	Os	[HCpOs(Cl)(PPh3)2]+	1.2	DCE	Estimated using enthalpy of protonation (ref of enthalpy: CF3SO3H)	https://doi.org/10.1021/acs.chemrev.5b00695	https://doi.org/10.1021/ja410718r	https://doi.org/10.1021/ja9441930	8605 ; 1952 ; 937	298		150	[Os]1([C@@H]2C=C[C@H]1[CH]2)(P(c1ccccc1)(c1ccccc1)c1ccccc1)P(c1ccccc1)(c1ccccc1)c1ccccc1.[Cl]	[OsH][C@H]1C=CC=C1.P(c1ccccc1)(c1ccccc1)c1ccccc1.P(c1ccccc1)(c1ccccc1)c1ccccc1.[Cl]
151	Os	[HOs(CO)(PiPr)(HBPz3)]+	9.3	CD2Cl2	PPh3	https://doi.org/10.1021/acs.chemrev.5b00695	https://doi.org/10.1021/om970407l		8605 ; 4466	T = 213 K		151	[RuH]12(N3C=CCN3[B@@H](N3N1C=CC3)N1N2C=CC1)([C][O])P(C(C)C)(C(C)C)C(C)C	[RuH].n1cccn1[BH](n1nccc1)n1nccc1.[C]=O.P(C(C)C)(C(C)C)C(C)C.[H]
152	Fe	HCpFe(CO)(SiCl3)2	2.6	acetonitrile	acetonitrile	https://doi.org/10.1021/acs.chemrev.5b00695	https://pubs.acs.org/doi/pdf/10.1021/ic50100a012		8605 ; 1162	298		152	[Fe]1([C][O])[C@@H]2C=C[C@H]1[CH]2.[Si](Cl)(Cl)Cl.[Si](Cl)(Cl)Cl	[FeH]([C][O])[C@H]1C=CC=C1.[Si](Cl)(Cl)Cl.[Si](Cl)(Cl)Cl
153	Fe	[HFe(CO)3(dmpm)]+	7.1	DCE	Estimated using enthalpy of protonation (ref of enthalpy: CF3SO3H)	https://doi.org/10.1021/acs.chemrev.5b00695	https://doi.org/10.1021/ja410718r	https://doi.org/10.1021/ar00050a001	8606 ; 1951 ; 53	298		153	[Fe]1(P(CP1(C)C)(C)C)([C][O])([C][O])[C][O]	[FeH]1(P(CP1(C)C)(C)C)([C][O])([C][O])[C][O]
154	Fe	[HFe(CO)3(dcpe)]+	6.1	DCE	Estimated using enthalpy of protonation (ref of enthalpy: CF3SO3H)	https://doi.org/10.1021/acs.chemrev.5b00695	https://doi.org/10.1021/ja410718r	https://doi.org/10.1021/ar00050a001	8606 ; 1951 ; 53	298		154	[Fe]1([C][O])([C][O])([C][O])P(CCP1(C1CCCCC1)C1CCCCC1)(C1CCCCC1)C1CCCCC1	[FeH]1([C][O])([C][O])([C][O])P(CCP1(C1CCCCC1)C1CCCCC1)(C1CCCCC1)C1CCCCC1
155	Fe	[HFe(CO)3(PCy3)2]+	0.85 ; 2.8	CH2Cl2	PEtPh2 ; PPh3	https://doi.org/10.1021/acs.chemrev.5b00695	https://doi.org/10.1002/chem.200601484		8606 ; 3801	298		155	[Fe]([C][O])([C][O])([C][O])(P(C1CCCCC1)(C1CCCCC1)C1CCCCC1)P(C1CCCCC1)(C1CCCCC1)C1CCCCC1	[FeH]([C][O])([C][O])([C][O])(P(C1CCCCC1)(C1CCCCC1)C1CCCCC1)P(C1CCCCC1)(C1CCCCC1)C1CCCCC1
156	Fe	[HFe(CO)3(PMe3)2]+	3.2	DCE	Estimated using enthalpy of protonation (ref of enthalpy: CF3SO3H)	https://doi.org/10.1021/acs.chemrev.5b00695	https://doi.org/10.1021/ja410718r	https://doi.org/10.1021/ja9441930	8606 ; 1952 ; 937	298		156	[Fe]([C][O])([C][O])([C][O])(P(C)(C)C)P(C)(C)C	[FeH]([C][O])([C][O])([C][O])(P(C)(C)C)P(C)(C)C
157	Ru	[(H2)RuCl(PPh3)(P-py-P)]+	5.1	CH2Cl2	[HPtol3]BF4	https://doi.org/10.1021/acs.chemrev.5b00695	https://doi.org/10.1002/chem.200601484	https://doi.org/10.1021/om970207+	8606 ; 3802 ; 3946	298		157	[RuH]12(N3C(=CCC=C3CP1(c1ccccc1)c1ccccc1)CP2(c1ccccc1)c1ccccc1)(P(c1ccccc1)(c1ccccc1)c1ccccc1)Cl	[RuH2]12(N3C(=CCC=C3CP1(c1ccccc1)c1ccccc1)CP2(c1ccccc1)c1ccccc1)P(c1ccccc1)(c1ccccc1)c1ccccc1.[Cl]
158	Os	[(H2)Os(Cl)(PPh3)(P-py-P)]+	7.5	CH2Cl2	RuH(Cp)(PPh3)2	https://doi.org/10.1021/acs.chemrev.5b00695	https://doi.org/10.1016/S0010-8545(99)00066-1	https://doi.org/10.1021/om970207+	8606 ; 94 ; 3946	298		158	N12C3=CCC=C1CP(c1ccccc1)(c1ccccc1)[OsH]2(P(C3)(c1ccccc1)c1ccccc1)(P(c1ccccc1)(c1ccccc1)c1ccccc1)Cl	N12C(=CCC=C1CP(c1ccccc1)c1ccccc1)CP(c1ccccc1)(c1ccccc1)[OsH2]2(P(c1ccccc1)(c1ccccc1)c1ccccc1)Cl
159	Fe	[HFe(Py2Tstacn)]+2	1.8	acetonitrile/H2O	Warning DFT calculated' H2O	https://doi.org/10.1021/acs.chemrev.5b00695	https://doi.org/10.1002/chem.201303317		8606 ; 6180	298		159	[Fe]1234[N@@]5(CCN(CC[N@]1(CC5)CC1=CCC=CN31)[S@]([O])(O4)c1ccc(cc1)C)CC1=CCC=CN21	[FeH]1234[N@@]5(CCN(CC[N@]1(CC5)CC1=CCC=CN31)[S@]([O])(O4)c1ccc(cc1)C)CC1=CCC=CN21
160	Ru	[(H2)CpRu(dtfpe)]+	4.3	CH2Cl2	[HPtol3]BF4	https://doi.org/10.1021/acs.chemrev.5b00695	https://pubs.acs.org/doi/pdf/10.1021/ic00004a001		8606 ; 594	298		160	[RuH][C@H]1C=CC=C1.P(CCP(c1ccc(cc1)C(F)(F)F)c1ccc(cc1)C(F)(F)F)(c1ccc(cc1)C(F)(F)F)c1ccc(cc1)C(F)(F)F	[RuH2][C@@H]1[CH]C=C[CH]1.P(CCP(c1ccc(cc1)C(F)(F)F)c1ccc(cc1)C(F)(F)F)(c1ccc(cc1)C(F)(F)F)c1ccc(cc1)C(F)(F)F
161	Ru	[H2CpRu(dtfpe)]+	4.4	CH2Cl2	[HPtol3]BF4	https://doi.org/10.1021/acs.chemrev.5b00695	https://pubs.acs.org/doi/pdf/10.1021/ic00004a001		8606 ; 594	298		161	[RuH][C@@H]1C=CC=C1.P(CCP(c1ccc(cc1)C(F)(F)F)c1ccc(cc1)C(F)(F)F)(c1ccc(cc1)C(F)(F)F)c1ccc(cc1)C(F)(F)F	[RuH2][C@@H]1C=CC=C1.P(CCP(c1ccc(cc1)C(F)(F)F)c1ccc(cc1)C(F)(F)F)(c1ccc(cc1)C(F)(F)F)c1ccc(cc1)C(F)(F)F
162	Ru	[HCp*2Ru]+	0.8	DCE	Estimated using enthalpy of protonation (ref of enthalpy: CF3SO3H)	https://doi.org/10.1021/acs.chemrev.5b00695	https://doi.org/10.1021/ja410718r	https://doi.org/10.1021/ar00050a001	8606 ; 1951 ; 53	298		162	[Ru]([C@@]1(C(=C(C(=C1C)C)C)C)C)[C@@]1(C(=C(C(=C1C)C)C)C)C	[RuH]([C@@]1(C(=C(C(=C1C)C)C)C)C)[C@]1(C(=C(C(=C1C)C)C)C)C
163	Os	[HCp*2Os]+	9.9	acetonitrile	[NH3Ph]BF4	https://doi.org/10.1021/acs.chemrev.5b00695	http://actachemscand.org/pdf/acta_vol_49_p0632-0635.pdf		8606 ; 633	298		163	[C@]1(C(=C(C(=C1C)C)C)C)(C)[Os][C@@]1(C(=C(C(=C1C)C)C)C)C	C1(=C([C@@](C(=C1C)C)(C)[OsH][C@]1(C(=C(C(=C1C)C)C)C)C)C)C
164	Fe	[(H2)HFe(dtfpe)2]+	7.8	THF	OsH2(dtfpe)2	https://doi.org/10.1021/acs.chemrev.5b00695	https://doi.org/10.1021/ja994428d	https://doi.org/10.1021/ja00087a024	8606 ; 9164 ; 3383	298		164	P1(CCP(c2ccc(cc2)C(F)(F)F)(c2ccc(cc2)C(F)(F)F)[FeH2]21P(CCP2(c1ccc(cc1)C(F)(F)F)c1ccc(cc1)C(F)(F)F)(c1ccc(cc1)C(F)(F)F)c1ccc(cc1)C(F)(F)F)(c1ccc(cc1)C(F)(F)F)c1ccc(cc1)C(F)(F)F	P1(CCP(c2ccc(cc2)C(F)(F)F)(c2ccc(cc2)C(F)(F)F)[FeH2]21P(CCP2(c1ccc(cc1)C(F)(F)F)c1ccc(cc1)C(F)(F)F)(c1ccc(cc1)C(F)(F)F)c1ccc(cc1)C(F)(F)F)(c1ccc(cc1)C(F)(F)F)c1ccc(cc1)C(F)(F)F
165	Ru	[(H2)HRu(dtfpe)2]+	9	THF	RuH(Cp)(PPh3)2	https://doi.org/10.1021/acs.chemrev.5b00695	https://doi.org/10.1021/ja994428d	https://doi.org/10.1021/ja00087a024	8606 ; 9164 ; 3383	298		165	P1(CCP(c2ccc(cc2)C(F)(F)F)(c2ccc(cc2)C(F)(F)F)[RuH2]21P(CCP2(c1ccc(cc1)C(F)(F)F)c1ccc(cc1)C(F)(F)F)(c1ccc(cc1)C(F)(F)F)c1ccc(cc1)C(F)(F)F)(c1ccc(cc1)C(F)(F)F)c1ccc(cc1)C(F)(F)F	P1(CCP(c2ccc(cc2)C(F)(F)F)(c2ccc(cc2)C(F)(F)F)[RuH2]21P(CCP2(c1ccc(cc1)C(F)(F)F)c1ccc(cc1)C(F)(F)F)(c1ccc(cc1)C(F)(F)F)c1ccc(cc1)C(F)(F)F)(c1ccc(cc1)C(F)(F)F)c1ccc(cc1)C(F)(F)F
166	Os	[(H2)HOs(dtfpe)2]+	8.4	THF	RuH(Cp)(PPh3)2	https://doi.org/10.1021/acs.chemrev.5b00695	https://doi.org/10.1021/ja994428d	https://doi.org/10.1021/ja00087a024	8606 ; 9164 ; 3382	298		166	P1(CCP(c2ccc(cc2)C(F)(F)F)(c2ccc(cc2)C(F)(F)F)[OsH2]21P(CCP2(c1ccc(cc1)C(F)(F)F)c1ccc(cc1)C(F)(F)F)(c1ccc(cc1)C(F)(F)F)c1ccc(cc1)C(F)(F)F)(c1ccc(cc1)C(F)(F)F)c1ccc(cc1)C(F)(F)F	P(CCP(c1ccc(cc1)C(F)(F)F)c1ccc(cc1)C(F)(F)F)(c1ccc(cc1)C(F)(F)F)c1ccc(cc1)C(F)(F)F.P(CCP(c1ccc(cc1)C(F)(F)F)c1ccc(cc1)C(F)(F)F)(c1ccc(cc1)C(F)(F)F)c1ccc(cc1)C(F)(F)F.[OsH].[H].[H]
167	Ru	[(H2)Ru(HBPz3)(PPh3)2]+	7.6	CD2Cl2	RuH(Cp)(dppm)	https://doi.org/10.1021/acs.chemrev.5b00695	https://doi.org/10.1021/om9710374		8606 ; 2056	298		167	[RuH]12(N3C=CCN3[B@@H](N3N1C=CC3)N1N2C=CC1)(P(c1ccccc1)(c1ccccc1)c1ccccc1)P(c1ccccc1)(c1ccccc1)c1ccccc1	[RuH2]12(N3C=CCN3[B@@H](N3N1C=CC3)N1N2C=CC1)P(c1ccccc1)(c1ccccc1)c1ccccc1.P(c1ccccc1)(c1ccccc1)c1ccccc1
168	Ru	[(H2)Ru(HBPz3)(dppe)]+	7.9	CD2Cl2	RuH(Cp)(dppm)	https://doi.org/10.1021/acs.chemrev.5b00695	https://doi.org/10.1021/om9710374		8606 ; 2056	298		168	[RuH]123(N4C=CCN4[B@@H](N4N1C=CC4)N1N2C=CC1)P(c1ccccc1)(c1ccccc1)CCP3(c1ccccc1)c1ccccc1	[RuH2]12(N3C=CCN3[B@@H](N3N1C=CC3)N1N2C=CC1)P(c1ccccc1)(c1ccccc1)CCP(c1ccccc1)c1ccccc1
169	Ru	[(H2)Ru(HBPz3)(CH3CN)(PPh3)]+	8.9	CD2Cl2	RuH(Cp)(PPh3)2	https://doi.org/10.1021/acs.chemrev.5b00695	https://doi.org/10.1021/om9710374		8606 ; 2056	T = 243 K		169	[RuH]12(N3C=CCN3[B@@H](N3N1C=CC3)N1N2C=CC1)(P(c1ccccc1)(c1ccccc1)c1ccccc1)[N][C]C	[RuH2]12(N3C=CCN3[B@@H](N3N1C=CC3)N1N2C=CC1)[N][C]C.P(c1ccccc1)(c1ccccc1)c1ccccc1
170	Os	trans-[H2CpOs(dppm)]+	10	CD2Cl2	RuH(Cp)(PPh3)2	https://doi.org/10.1021/acs.chemrev.5b00695	https://doi.org/10.1021/om9804071		8606 ; 4558	298		170	[OsH][C@@H]1C=CC=C1.P(CP(c1ccccc1)c1ccccc1)(c1ccccc1)c1ccccc1	[OsH2][C@@H]1C=CC=C1.P(CP(c1ccccc1)c1ccccc1)(c1ccccc1)c1ccccc1
171	Os	cis-[H2CpOs(dppm)]+	10.9	CD2Cl2	RuH(Cp)(PPh3)2	https://doi.org/10.1021/acs.chemrev.5b00695	https://doi.org/10.1021/om9804071		8606 ; 4558	298		171	[OsH][C@H]1C=CC=C1.P(CP(c1ccccc1)c1ccccc1)(c1ccccc1)c1ccccc1	[OsH2][C@H]1C=CC=C1.P(CP(c1ccccc1)c1ccccc1)(c1ccccc1)c1ccccc1
172	Os	trans-[H2CpOs(dppe)]+	11.8	CD2Cl2	RuH(Cp)(PPh3)2	https://doi.org/10.1021/acs.chemrev.5b00695	https://doi.org/10.1021/om9804071		8606 ; 4558	298		172	[OsH]1(P(CCP1(c1ccccc1)c1ccccc1)(c1ccccc1)c1ccccc1)[C@@H]1C=CC=C1	[OsH2][C@H]1C=CC=C1.P(CCP(c1ccccc1)c1ccccc1)(c1ccccc1)c1ccccc1
173	Os	cis-[H2CpOs(dppe)]+	9.9	CD2Cl2	RuH(Cp)(PPh3)2	https://doi.org/10.1021/acs.chemrev.5b00695	https://doi.org/10.1021/om9804071		8606 ; 4558	298		173	[OsH]1(P(CCP1(c1ccccc1)c1ccccc1)(c1ccccc1)c1ccccc1)[C@@H]1C=CC=C1	[OsH2][C@H]1C=CC=C1.P(CCP(c1ccccc1)c1ccccc1)(c1ccccc1)c1ccccc1
174	Os	trans-[H2CpOs(dppp)]+	13.4	CD2Cl2	CpHOs(dppe)	https://doi.org/10.1021/acs.chemrev.5b00695	https://doi.org/10.1021/om9804071		8606 ; 4558	298		174	[OsH]1(P(CCCP1(c1ccccc1)c1ccccc1)(c1ccccc1)c1ccccc1)[C@H]1[CH]C=C[CH]1	[OsH2][C@H]1C=CC=C1.P(CCCP(c1ccccc1)c1ccccc1)(c1ccccc1)c1ccccc1
175	Os	trans-[H2CpOs(PPh3)2]+	13.4	CD2Cl2	CpHOs(dppp)	https://doi.org/10.1021/acs.chemrev.5b00695	https://doi.org/10.1021/om9804071		8606 ; 4558	298		175	[OsH](P(c1ccccc1)(c1ccccc1)c1ccccc1)(P(c1ccccc1)(c1ccccc1)c1ccccc1)[C@@H]1C=CC=C1	[OsH2][C@@H]1C=CC=C1.P(c1ccccc1)(c1ccccc1)c1ccccc1.P(c1ccccc1)(c1ccccc1)c1ccccc1
176	Os	[(H2)Os(HBPz3)(PPh3)2]+	8.8	CD2Cl2	CpRuH(PPh3)2	https://doi.org/10.1021/acs.chemrev.5b00695	https://doi.org/10.1021/om9804071		8606 ; 4558	298		176	N12C=CCN1[B@H]1N3N(C=CC3)[OsH]2(N2C=CCN12)(P(c1ccccc1)(c1ccccc1)c1ccccc1)P(c1ccccc1)(c1ccccc1)c1ccccc1	N12C=CCN1[B@H]1N3N(C=CC3)[OsH2]2(N2C=CCN12)P(c1ccccc1)(c1ccccc1)c1ccccc1.P(c1ccccc1)(c1ccccc1)c1ccccc1
177	Ru	[HCpRu(Cl)(PMe3)2]+	2.1	DCE	Estimated using enthalpy of protonation (ref of enthalpy: CF3SO3H)	https://doi.org/10.1021/acs.chemrev.5b00695	https://doi.org/10.1021/ja410718r	https://doi.org/10.1021/ar00050a001	8606 ; 1953 ; 53	298		177	[Ru]1[C@@H]2C=C[C@H]1[CH]2.P(C)(C)C.P(C)(C)C.[Cl]	[RuH][C@@H]1C=CC=C1.P(C)(C)C.P(C)(C)C.[Cl]
178	Ru	[(H2)Ru(Cl)(dppe)2]+	6	CH2Cl2	PPhEt2	https://doi.org/10.1021/acs.chemrev.5b00695	https://doi.org/10.1002/chem.200601484	https://doi.org/10.1021/ic00104a043	8606 ; 3802 ; 6286	298		178	[RuH]12(P(CCP1(c1ccccc1)c1ccccc1)(c1ccccc1)c1ccccc1)(P(CCP2(c1ccccc1)c1ccccc1)(c1ccccc1)c1ccccc1)Cl	[RuH2]1(P(CCP1(c1ccccc1)c1ccccc1)(c1ccccc1)c1ccccc1)(P(CCP(c1ccccc1)c1ccccc1)(c1ccccc1)c1ccccc1)Cl
179	Ru	[HCp*Ru(Cl)(PMe3)2]+	7.1	DCE	Estimated using enthalpy of protonation (ref of enthalpy: CF3SO3H)	https://doi.org/10.1021/acs.chemrev.5b00695	https://doi.org/10.1021/ja410718r	https://doi.org/10.1021/ar00050a001	8606 ; 1953 ; 53	298		179	[Ru]1[C@@]2([C]([C@]1(C(=C2C)C)C)C)C.P(C)(C)C.P(C)(C)C.[Cl]	[RuH][C@]1(C(=C(C(=C1C)C)C)C)C.P(C)(C)C.P(C)(C)C.[Cl]
180	Ru	[(H2)CpRu(PTA)2]+	-1.1	H2O	Warning DFT calculated' Estimated using thermodynamic cycle	https://doi.org/10.1021/acs.chemrev.5b00695	https://doi.org/10.1021/om100326z		8606 ; 5130	298		180	[RuH][C@@H]1C=CC=C1.P12CN3CN(C1)CN(C2)C3.P12CN3CN(C1)CN(C2)C3	[RuH2][C@H]1C=CC=C1.P12CN3CN(C1)CN(C2)C3.P12CN3CN(C1)CN(C2)C3
181	Ru	[(H2)Cp*Ru(PTA)2]+	0.5	H2O	Warning DFT calculated' Estimated using thermodynamic cycle	https://doi.org/10.1021/acs.chemrev.5b00695	https://doi.org/10.1021/om100326z		8606 ; 5130	298		181	[RuH]1[C@@]2(C(=C([C@]1([C]2C)C)C)C)C.P12CN3CN(C1)CN(C2)C3.P12CN3CN(C1)CN(C2)C3	[RuH2][C@@]1(C(=C(C(=C1C)C)C)C)C.P12CN3CN(C1)CN(C2)C3.P12CN3CN(C1)CN(C2)C3
182	Ru	[H2CpRu(PTA)2]+	0.3	H2O	Warning DFT calculated' Estimated using thermodynamic cycle	https://doi.org/10.1021/acs.chemrev.5b00695	https://doi.org/10.1021/om100326z		8606 ; 5130	298		182	[RuH][C@H]1C=CC=C1.P12CN3CN(C1)CN(C2)C3.P12CN3CN(C1)CN(C2)C3	[RuH2][C@@H]1[CH]C=C[CH]1.P12CN3CN(C1)CN(C2)C3.P12CN3CN(C1)CN(C2)C3
183	Ru	[H2Cp*Ru(PTA)2]+	4.7	H2O	Warning DFT calculated' Estimated using thermodynamic cycle	https://doi.org/10.1021/acs.chemrev.5b00695	https://doi.org/10.1021/om100326z		8606 ; 5130	298		183	[RuH]1[C@]2(C(=C([C@@]1([C]2C)C)C)C)C.P12CN3CN(C1)CN(C2)C3.P12CN3CN(C1)CN(C2)C3	[RuH2][C@@]1(C(=C(C(=C1C)C)C)C)C.P12CN3CN(C1)CN(C2)C3.P12CN3CN(C1)CN(C2)C3
184	Ru	[H2CpRu(PPh2C6H4PPh2)]+	6	THF	[CpRu(dppm)(?2-H2)]BF4	https://doi.org/10.1021/acs.chemrev.5b00695	https://doi.org/10.1021/ja0506861		8606 ; 7807	298		184	[RuH][C@H]1[CH]C=C[CH]1.P(c1ccccc1P(c1ccccc1)c1ccccc1)(c1ccccc1)c1ccccc1	[RuH2][C@H]1C=CC=C1.P(c1ccccc1P(c1ccccc1)c1ccccc1)(c1ccccc1)c1ccccc1
185	Ru	[(mu-H)Ru2(CO)4((eta5-C5H3)2(SiMe2)2)]+	6.5	acetonitrile	[HPPh3]BF4	https://doi.org/10.1021/acs.chemrev.5b00695	https://doi.org/10.1021/om000825h		8606 ; 694	298		185	[Ru]([C@]12C=CC=C1[Si]([C@@]1([Ru]([C][O])[C][O])C=CC=C1[Si]2(C)C)(C)C)([C][O])[C][O]	[Ru]1([C@@H]2C=C3[C@]1([CH]2)[Si]([C@]12[RuH]([C@H]([CH]1)C=C2[Si]3(C)C)([C][O])[C][O])(C)C)([C][O])[C][O]
186	Ru	[H2CpRu(PPh3)2]+	8	THF	HPCy3+	https://doi.org/10.1021/acs.chemrev.5b00695	https://doi.org/10.1021/ja994428d		8606 ; 9170	298		186	[RuH][C@@H]1C=CC=C1.P(c1ccccc1)(c1ccccc1)c1ccccc1.P(c1ccccc1)(c1ccccc1)c1ccccc1	[RuH2][C@@H]1C=CC=C1.P(c1ccccc1)(c1ccccc1)c1ccccc1.P(c1ccccc1)(c1ccccc1)c1ccccc1
187	Os	trans-[H2CpOs(PPh3)2]+	11.6	DCE	Estimated using enthalpy of protonation (ref of enthalpy: CF3SO3H)	https://doi.org/10.1021/acs.chemrev.5b00695	https://doi.org/10.1021/ja410718r	https://doi.org/10.1021/ar00050a001	8606 ; 1952 ; 53	298		187	P(c1ccccc1)(c1ccccc1)(c1ccccc1)[OsH](P(c1ccccc1)(c1ccccc1)c1ccccc1)[C@@H]1C=CC=C1	P(c1ccccc1)(c1ccccc1)c1ccccc1.P(c1ccccc1)(c1ccccc1)c1ccccc1.C1=CC=C[C@@H]1[OsH2]
188	Ru	[(H2)RuCl(tmeP2NH2)]+	6.9	CD2Cl2	[HP-t-Bu2Ph]BPh4	https://doi.org/10.1021/acs.chemrev.5b00695	https://doi.org/10.1139/v05-236		8607 ; 168	298		188	[RuH]123(P(c4c(cccc4)C[N@H]2C(C([N@@H]3Cc2c(P1(c1ccccc1)c1ccccc1)cccc2)(C)C)(C)C)(c1ccccc1)c1ccccc1)Cl	[RuH2]123P(c4c(cccc4)C[N@H]2C(C([N@@H]3Cc2c(P1(c1ccccc1)c1ccccc1)cccc2)(C)C)(C)C)(c1ccccc1)c1ccccc1.[Cl]
189	Ru	[(H2)RuCl(PPh3)2(dach)]+	8.4	CD2Cl2	[HPBu3]BPh4	https://doi.org/10.1021/acs.chemrev.5b00695	https://doi.org/10.1139/v05-236		8607 ; 168	298		189	[RuH]1(P(c2ccccc2)(c2ccccc2)c2ccccc2)(P(c2ccccc2)(c2ccccc2)c2ccccc2)([NH2][C@H]2[C@H]([NH2]1)CCCC2)Cl	[RuH2]1(P(c2ccccc2)(c2ccccc2)c2ccccc2)([NH2][C@H]2[C@H]([NH2]1)CCCC2)Cl.P(c1ccccc1)(c1ccccc1)c1ccccc1
190	Ru	[H2CpRu(dppp)]+	8.7	THF	[RuH2(Cp)(PPh3)2]BF4	https://doi.org/10.1021/acs.chemrev.5b00695	https://doi.org/10.1021/ja994428d		8607 ; 9164	298		190	[RuH][C@H]1[CH]C=C[CH]1.P(CCCP(c1ccccc1)c1ccccc1)(c1ccccc1)c1ccccc1	[RuH2][C@@H]1C=CC=C1.P(CCCP(c1ccccc1)c1ccccc1)(c1ccccc1)c1ccccc1
191	Ru	[(H2)CpRu(dppm)]+	7.2	THF	[RuH2(Cp)(PPh3)2]BF4	https://doi.org/10.1021/acs.chemrev.5b00695	https://doi.org/10.1021/ja994428d		8607 ; 9165	298		191	[RuH][C@@H]1C=CC=C1.P(CP(c1ccccc1)c1ccccc1)(c1ccccc1)c1ccccc1	[RuH2][C@H]1C=CC=C1.P(CP(c1ccccc1)c1ccccc1)(c1ccccc1)c1ccccc1
192	Ru	[(H2)CpRu(dppm)]+	6.3	DCE	Estimated using enthalpy of protonation (ref of enthalpy: CF3SO3H)	https://doi.org/10.1021/acs.chemrev.5b00695	https://doi.org/10.1021/ja410718r	https://doi.org/10.1021/ar00050a001	8607 ; 1952 ; 53	298		192	[RuH][C@@H]1C=CC=C1.P(CP(c1ccccc1)c1ccccc1)(c1ccccc1)c1ccccc1	[RuH2][C@H]1C=CC=C1.P(CP(c1ccccc1)c1ccccc1)(c1ccccc1)c1ccccc1
193	Ru	[H2CpRu(dppe)]+	6.4	DCE	Estimated using enthalpy of protonation (ref of enthalpy: CF3SO3H)	https://doi.org/10.1021/acs.chemrev.5b00695	https://doi.org/10.1021/ja410718r	https://doi.org/10.1021/ar00050a001	8607 ; 1952 ; 53	298		193	P(CCP(c1ccccc1)c1ccccc1)(c1ccccc1)c1ccccc1.C1=CC=C[C@@H]1[RuH]	P(CCP(c1ccccc1)c1ccccc1)(c1ccccc1)c1ccccc1.C1=CC=C[C@H]1[RuH2]
194	Ru	[H2CpRu(dppe)]+	7.4	THF	[RuH2(Cp)(PPh3)2]BF4	https://doi.org/10.1021/acs.chemrev.5b00695	https://doi.org/10.1021/ja994428d		8607 ; 9165	298		194	P(CCP(c1ccccc1)c1ccccc1)(c1ccccc1)c1ccccc1.[CH]1C=C[CH][C@@H]1[RuH]	P(CCP(c1ccccc1)c1ccccc1)(c1ccccc1)c1ccccc1.C1=CC=C[C@H]1[RuH2]
195	Os	[H2CpOs(PPh2Me)2]+	12.1	DCE	Estimated using enthalpy of protonation (ref of enthalpy: CF3SO3H)	https://doi.org/10.1021/acs.chemrev.5b00695	https://doi.org/10.1021/ja410718r	https://doi.org/10.1021/ar00050a001	8607 ; 1952 ; 53	298		195	P([OsH](P(c1ccccc1)(c1ccccc1)C)[C@@H]1C=CC=C1)(c1ccccc1)(c1ccccc1)C	P(c1ccccc1)(c1ccccc1)C.P(c1ccccc1)(c1ccccc1)C.[OsH2][C@H]1[CH]C=C[CH]1
196	Ru	[H2Cp*Ru(dppp)]+	10.4	THF	[Cp*Ru(H2) (dppm) ]+	https://doi.org/10.1021/acs.chemrev.5b00695	https://doi.org/10.1021/om00037a033		8607 ; 168	298		196	[RuH]1[C@@]2([C]([C@]1(C(=C2C)C)C)C)C.P(CCCP(c1ccccc1)c1ccccc1)(c1ccccc1)c1ccccc1	[RuH2][C@@]1(C(=C(C(=C1C)C)C)C)C.P(CCCP(c1ccccc1)c1ccccc1)(c1ccccc1)c1ccccc1
197	Ru	[H2Cp*Ru(PPh3)2]+	11.1	THF	HP(t-Bu)2	https://doi.org/10.1021/acs.chemrev.5b00695	https://doi.org/10.1021/om00037a033		8607 ; 168	298		197	P(c1ccccc1)(c1ccccc1)c1ccccc1.P(c1ccccc1)(c1ccccc1)c1ccccc1.C1(=C(C(=C([C@@]1([RuH])C)C)C)C)C	P(c1ccccc1)(c1ccccc1)c1ccccc1.P(c1ccccc1)(c1ccccc1)c1ccccc1.C1(=C([C]([C@@]([C]1C)([RuH2])C)C)C)C
198	Ru	[H2Cp*Ru(PPh2Me)2]+	12.2	THF	HP(t-Bu)2	https://doi.org/10.1021/acs.chemrev.5b00695	https://doi.org/10.1021/om00037a033		8607 ; 168	298		198	P(c1ccccc1)(c1ccccc1)C.P(c1ccccc1)(c1ccccc1)C.C1(=C([C@](C(=C1C)C)([RuH])C)C)C	P(c1ccccc1)(c1ccccc1)C.P(c1ccccc1)(c1ccccc1)C.C1(=C(C(=C([C@@]1([RuH2])C)C)C)C)C
199	Ru	[H2Cp*Ru(PPhMe2)2]+	14.3	THF	[Cp*RuH2(PMePh2)2]+	https://doi.org/10.1021/acs.chemrev.5b00695	https://doi.org/10.1021/om00037a033		8607 ; 168	298		199	P(c1ccccc1)(C)C.P(c1ccccc1)(C)C.C1(=C([C@]2([C]([C@@]1([RuH]2)C)C)C)C)C	P(c1ccccc1)(C)C.P(c1ccccc1)(C)C.C1(=C([C]([C@@]([C]1C)([RuH2])C)C)C)C
200	Ru	[H2Cp*Ru(PMe3)2]+	16.3	THF	[Cp*RuH2(PMe2Ph)2]+	https://doi.org/10.1021/acs.chemrev.5b00695	https://doi.org/10.1021/om00037a033		8607 ; 168	298		200	P(C)(C)C.P(C)(C)C.C1(=C([C@](C(=C1C)C)([RuH])C)C)C	P(C)(C)C.P(C)(C)C.C1(=C([C@](C(=C1C)C)([RuH2])C)C)C
201	Ru	[(H2)CpRu(dape)]+	8.1	CH2Cl2	[CpRuH2(PPh3)2]+	https://doi.org/10.1021/acs.chemrev.5b00695	https://doi.org/10.1021/ja00003a022		8607 ; 880	298		201	P(CCP(c1ccc(cc1)OC)c1ccc(cc1)OC)(c1ccc(cc1)OC)c1cccc(c1)OC.[RuH][C@H]1C=CC=C1	P(CCP(c1ccc(cc1)OC)c1ccc(cc1)OC)(c1ccc(cc1)OC)c1cccc(c1)OC.[RuH2][C@H]1C=CC=C1
202	Ru	[H2CpRu(dape)]+	8.5	CH2Cl2	[CpRuH2(PPh3)2]+	https://doi.org/10.1021/acs.chemrev.5b00695	https://doi.org/10.1021/ja00003a022		8607 ; 880	298		202	P(CCP(c1ccc(cc1)OC)c1ccc(cc1)OC)(c1ccc(cc1)OC)c1cccc(c1)OC.C1=CC=C[C@H]1[RuH]	P(CCP(c1ccc(cc1)OC)c1ccc(cc1)OC)(c1ccc(cc1)OC)c1cccc(c1)OC.[C@H]1(C=CC=C1)[RuH2]
203	Ru	[(H2)CpRu(dape)]+	8.6	THF	[CpRuH2(PPh3)2]+	https://doi.org/10.1021/acs.chemrev.5b00695	https://doi.org/10.1021/ja00003a022		8607 ; 880	298		203	P(CCP(c1ccc(cc1)OC)c1ccc(cc1)OC)(c1ccc(cc1)OC)c1cccc(c1)OC.[RuH][C@H]1C=CC=C1	P(CCP(c1ccc(cc1)OC)c1ccc(cc1)OC)(c1ccc(cc1)OC)c1cccc(c1)OC.[RuH2][C@@H]1[CH]C=C[CH]1
204	Ru	[H2CpRu(dape)]+	9	THF	[CpRuH2(PPh3)2]+	https://doi.org/10.1021/acs.chemrev.5b00695	https://doi.org/10.1021/ja00003a022		8607 ; 880	298		204	P(CCP(c1ccc(cc1)OC)c1ccc(cc1)OC)(c1ccc(cc1)OC)c1cccc(c1)OC.C1=CC=C[C@H]1[RuH]	P(CCP(c1ccc(cc1)OC)c1ccc(cc1)OC)(c1ccc(cc1)OC)c1cccc(c1)OC.[C@H]1(C=CC=C1)[RuH2]
